# 1 A Single Cell Transcriptomic Atlas Characterizes Aging Tissues in the Mouse

2  
3  
4 The Tabula Muris Consortium

## 5 6 7 **Abstract**

8 *Aging is characterized by a progressive loss of physiological integrity, leading to*  
9 *impaired function and increased vulnerability to death<sup>1</sup>. Despite rapid advances over*  
10 *recent years, many of the molecular and cellular processes which underlie progressive*  
11 *loss of healthy physiology are poorly understood<sup>2</sup>. To gain a better insight into these*  
12 *processes we have created a single cell transcriptomic atlas across the life span of *Mus**  
13 *musculus which includes data from 23 tissues and organs. We discovered cell-specific*  
14 *changes occurring across multiple cell types and organs, as well as age related changes*  
15 *in the cellular composition of different organs. Using single-cell transcriptomic data we*  
16 *were able to assess cell type specific manifestations of different hallmarks of aging, such*  
17 *as senescence<sup>3</sup>, genomic instability<sup>4</sup> and changes in the organism's immune system<sup>2</sup>. This*  
18 *Tabula Muris Senis provides a wealth of new molecular information about how the most*  
19 *significant hallmarks of aging are reflected in a broad range of tissues and cell types.*

20  
21  
22 We performed single cell RNA sequencing on 529,823 cells from male and female  
23 C57BL/6JN mice belonging to six age groups ranging from one month (human early  
24 childhood equivalent) to thirty months (human centenarian equivalent) (Figure 1a). We  
25 prepared single cell suspensions of the bladder, bone marrow, brain (cerebellum, cortex,  
26 hippocampus and striatum), fat (brown, gonadal, mesenteric and subcutaneous), heart and  
27 aorta, kidney, large intestine, limb muscle and diaphragm, liver, lung, mammary gland,  
28 pancreas, skin, spleen, thymus, tongue and trachea for all mice. Data were collected for  
29 all six age groups using microfluidic droplets (droplet), while the 3m, 18m and 24m time  
30 points were also analyzed using single cells sorted in microtiter well plates (FACS)  
31 (Extended Data Figure 1, Extended Data Figure 2a; Supplementary Tables 1&2;  
32 Supplementary Figures 1-3). The droplet data allow large numbers of cells to be analyzed  
33 using 3' end counting, while the FACS data allow for higher sensitivity measurements  
34 over smaller numbers of cells as well as sequence information across the entire transcript  
35 length. Analyzing multiple organs from the same animal enabled us to create data  
36 controlled for age, environment, and epigenetic effects.

37  
38 The previously published 3m time point, referred to as the *Tabula Muris*<sup>5</sup>, represents  
39 ~20% of the cells in the entire dataset and was used as a basis to perform semi-automated  
40 cell type annotation of the additional time points (Figure 1b, Extended Data Figure 2b).  
41 Using this approach, we were able to automatically annotate over 70% of the cells. All  
42 the automated cell annotations were reviewed and approved by human experts, and the  
43 remaining cells were annotated by hand, creating one of the largest manually curated  
44 single cell transcriptomic resources in existence. Many of these cell types have not  
45 previously been obtained in pure populations, and these data provide a wealth of new  
46 information on their characteristic gene-expression profiles. To demonstrate that the

47 annotations performed separately for each tissue were consistent across the entire  
48 organism, we clustered all cells using an unbiased, graph-based clustering approach<sup>6,7</sup>  
49 (Figure 1c,e) and showed that cell types such as B cells and endothelial cells which are  
50 shared across different organs and tissues occupy the same clusters irrespectively of the  
51 tissue of origin (Figure 1d,f).

52  
53 Tabula Muris Senis provides a powerful resource with which to explore aging related  
54 changes in specific cell types. The entire dataset can be explored interactively at [tabula-](http://tabula-muris-senis.ds.czbiohub.org)  
55 [muris-senis.ds.czbiohub.org](http://tabula-muris-senis.ds.czbiohub.org). Gene counts and metadata are available from figshare  
56 ([https://figshare.com/projects/Tabula\\_Muris\\_Senis/64982](https://figshare.com/projects/Tabula_Muris_Senis/64982)) and GEO (GSE132042), the  
57 code used for the analysis is available from GitHub ([https://github.com/czbiohub/tabula-](https://github.com/czbiohub/tabula-muris-senis)  
58 [muris-senis](https://github.com/czbiohub/tabula-muris-senis)) and the raw data are available from AWS Public Datasets  
59 (<https://s3.console.aws.amazon.com/s3/buckets/czb-tabula-muris-senis/>). An important  
60 use of the single cell data is to resolve whether gene expression changes observed in bulk  
61 experiments are due to changes in gene expression in each cell of the population, or  
62 whether the gene expression in each cell stays constant but the number of cells of that  
63 type changes, or both. In a global analysis of gene expression changes using the Tabula  
64 Muris Senis and bulk RNAseq from tissues<sup>8</sup>, we observed that in many cases changes in  
65 gene expression are due to both changes in the numbers of cells in a population and to  
66 changes in the gene expression levels in each cell (Extended Data Figure 3). As a  
67 specific example of this approach, we investigated how the expression of *Cdkn2a*  
68 changes with age. As *Cdkn2a/p16* is one of the most commonly used markers of  
69 senescence<sup>9</sup> and an important hallmark of aging<sup>10</sup>, we computed the fraction of cells  
70 expressing *Cdkn2a* at each age. The fraction of cells expressing the gene more than  
71 doubled in older animals in both FACS (Figure 2a) and droplet (Figure 2b), accompanied  
72 by a 2-fold increase in the actual expression level of p16 by those cells that did express it  
73 (Figure 2c,d).

74  
75 As another example of how the dataset can be used, we investigated how the cellular  
76 composition of each tissue changes with age by evaluating how the relative cell type  
77 proportions within a tissue change with age (Supplementary Table 3). The overall cell  
78 composition for all tissues is in Extended Data Figure 4. When interpreting  
79 compositional data, one must bear in mind that dissociation does not affect all of the cell  
80 types in a tissue equally, so changes in the relative composition of a given cell type with  
81 age are more meaningful than trying to compare proportions of different cell types at a  
82 single age<sup>11-13</sup>. Nonetheless, the changes in relative proportion of cell types provide  
83 important information on the effects of aging in a variety of tissues.

84  
85 The bladder has pronounced changes in cell type composition with age (Figure 2e).  
86 While the mesenchymal compartment of this tissue decreases by a factor of three over the  
87 lifetime of the mouse (Figure 2e left), the urothelial compartment increases by a similar  
88 amount (Figure 2e right). The observation that the bladder urothelial cells increase with  
89 age is concordant with known age-related urothelial changes<sup>14</sup>. Differential gene  
90 expression analysis of overall tissue changes with age revealed that stromal-associated  
91 genes (*Coll1a1*, *Coll1a2*, *Col3a1*, *Dcn*) are downregulated while epithelial-associated  
92 genes (*Krt15*, *Krt18*, *Sfn*) are upregulated, supporting the compositional observations

93 (Figure 2f,g; Supplementary Table 4). The decline of the endothelial population suggests  
94 that bladder aging in mice may be associated with lower organ vascularization, consistent  
95 with recent findings<sup>15,16</sup> and with the observed downregulation of vasculature associated  
96 genes *Htra1* and *Fos* (Figure 2f,g; Supplementary Table 4). The increase in the leukocyte  
97 population could be indicative of an inflammatory tissue microenvironment, a common  
98 hallmark of aging which is consistent with literature on overactive bladders<sup>17</sup> and  
99 supported by a significant overexpression of *Lgals3*, *Igfbp2* and *Ly6d* (Figure 2f,g;  
100 Supplementary Table 4).

101

102 Age-dependent changes in the kidney include a decrease in the relative abundance of  
103 mesangial cells, capillary endothelial cells, loop of Henle ascending limb epithelial cells  
104 and loop of Henle thick ascending limb epithelial cells (Figure 2h). Both mesangial cells  
105 and capillary endothelial cells are core glomerular cells and their relative abundances  
106 reduction (Figure 2h top panels), together with downregulation of *Egf* and *Atp1a1*  
107 (Figure 2i,j; Supplementary Table 4) suggest impaired glomerular filtration rate<sup>18,19</sup>. This  
108 finding is reinforced by the differential gene expression results indicating that  
109 uromodulin (*Umod*), the most abundant protein in urine<sup>20</sup>, is downregulated. *Umod* is  
110 produced by the epithelial cells that line the thick ascending limb, and therefore given the  
111 relative decrease in the proportion of epithelial cells in the ascending and thick ascending  
112 limb, our results suggest that normal kidney functions are impaired<sup>21</sup> (Figure 2h bottom  
113 panels, Figure 2i,j; Supplementary Table 4).

114

115 The liver is yet another tissue for which we observed changed tissue compositions with  
116 age, namely that the relative amount of hepatocytes decreases with age (Extended Data  
117 Figure 5a), which is supported by the reduction in the expression of albumin (*Alb*;  
118 Extended Data Figure 5b,c; Supplementary Table 4). Differential gene expression  
119 showed an increased immune signature, as illustrated by overexpression of *H2-Aa*, *H2-*  
120 *Ab1*, *H2-D1*, *H2-Eb1*, *Cd74*, *Lyz2* and others. Previous findings suggested that pro-  
121 inflammatory macrophages drive cellular senescence and identified *Il1b* as a gene whose  
122 liver expression was remarkably different with age<sup>22</sup>. We stained liver Kupffer cells  
123 (Extended Data Figure 5d) with *Clec4f* (canonical Kupffer cell marker) and found the  
124 number of *Clec4f*<sup>+</sup> cells do not change with age, consistent with the results of the tissue  
125 composition analysis (Supplementary Table 5; Extended Data Figure 5e). However, when  
126 co-staining with *Il1b*, we found an increase with age in the number of cells expressing  
127 *Clec4f* and *Il1b* (Extended Data Figure 5f,g). *Il1b* has low expression in normal  
128 physiological conditions<sup>23</sup>. Specific blocking of IL1-RI (*Il1b* receptor) in hepatocytes has  
129 been shown to attenuate cell death upon injury, supporting the idea that increased  
130 expression of *Il1b* in Kupffer cells is typically a poor prognostic<sup>24</sup>. Regarding immune  
131 defense within the liver, sinusoidal endothelial cells (LSECs) play a unique role, being  
132 the main carriers of the mannose receptor (*Mrc1*) in the liver. *Mrc1* expression in LSECs  
133 mediates endocytosis of pathogen and damage related molecules. Our findings identify  
134 increased *Mrc1* age-related expression. Inflammatory signals have been found to up  
135 regulate *Mrc1* expression and endocytosis<sup>25</sup>. Staining for *Mrc1* alongside classical LSEC  
136 marker *Pecam1* (Supplementary Table 5; Extended Data Figure 5h,i) found the number  
137 of *Mrc1* expressing LSECs increase over age (Extended Data Figure 5j,k). LSECs have a  
138 been found to have a reduced endocytic capacity in aged livers, while it has been

139 suggested that LSECs proliferate after injury or that bone-marrow derived LSECs  
140 progenitors are recruited to the liver. This suggests that changes in LSEC gene signatures  
141 with age are linked closely with their function in immune response.

142

143 In the case of spleen our results show that with age the proportion of T cells decreases  
144 while the relative amount of plasma cells increases (Figure 2k). This is supported by  
145 upregulation of B cell/plasma cell markers (Cd79a, Igj; Figure 2l,m; Supplementary  
146 Table 4) and downregulation of Cd3d (Figure 2m; Supplementary Table 4). Similarly, in  
147 mammary gland we also observed a significant decline of the T cell population (Extended  
148 Data Figure 6a). Age-related decline of T cell populations has been associated with an  
149 increased risk of infectious disease and cancer<sup>26</sup> and our results suggest that this may also  
150 happen in the spleen and mammary gland. We found that members of the AP1  
151 transcription factors<sup>27</sup> (Junb, Jund and Fos) were upregulated with age (Extended Data  
152 Figure 6b,c; Supplementary Table 4); this result is consistent with the observation that  
153 normal involution of the mammary gland is accompanied by significantly increased  
154 expression of many of these AP1-related transcription factors<sup>28</sup>.

155

156 Genomic instability is among the most widely studied aging hallmarks<sup>1</sup> and the full-  
157 length transcript data from the FACS data allows the analysis of somatic mutation  
158 accumulation with age. We used the Genome Analysis ToolKit (GATK)<sup>29</sup> to perform  
159 SNP discovery across all FACS samples simultaneously (Supplementary Table 6), using  
160 GATK Best Practices recommendations<sup>30,31</sup>. We focused on genes expressed in at least  
161 75% of cells for each age group within a particular tissue. We observed an age-related  
162 increase in the number of mutations across all of the organs we analyzed (Figure 3;  
163 Extended Data Figure 7a,8a,9a), with tongue and bladder being the most affected. Our  
164 analysis controls for sequencing coverage and gene expression levels (Figure 7b, 8b, 9b).  
165 The number of mutations observed at each age are larger than technical errors due to  
166 amplification and sequencing errors, which can be estimated using ERCC controls that  
167 were spiked into each well of the microtiter plates<sup>32</sup> (Figure 3; Extended Data Figure 7c-  
168 d, 8c-d, 9c-d). Despite the fact that it is difficult to infer genome-wide mutation rates  
169 from the transcriptome, which is known to inflate apparent mutational rates for a variety  
170 of reasons<sup>32</sup>, the observed trend is a useful indirect estimate of mutational frequency and  
171 genome stability.

172

173 A final hallmark of aging which we investigated was the effect of age-induced changes  
174 on the immune system<sup>2</sup>. Analyzing a complete set of tissues from the same individual  
175 animal using the full-length transcripts obtained in the FACS data enabled us to analyze  
176 clonal relationships between B-cells and T-cells throughout the organism. We  
177 computationally reconstructed the sequence of the B-cell receptor (BCR) and T-cell  
178 receptor (TCR) for B cells and T cells present in the FACS data using singlecell-ige and  
179 TraCeR, respectively<sup>33,34</sup>. BCRs were assembled for 6,050 cells (Figure 4a) and TCRs for  
180 6,000 cells (Figure 4b). The number of cells with assembled BCRs was 1,818 for 3m,  
181 1,356 for 18m and 2,876 for 24m old mice. We parsed the singlecell-ige<sup>33</sup> output to  
182 define B-cell clonotypes based on the sequence of the assembled BCR (Supplementary  
183 Table 7; see Extended Methods) and found that while most of the cells at 3m were not  
184 part of a clone (9% were part of a clonal family), the number of B-cells belonging to a

185 clonotype doubled at 18m (20%) when compared to 3m and doubled again from 18m to  
186 24m (~38%).

187

188 The number of cells with assembled TCRs were roughly equal between 3m, 18m and  
189 24m (2,076, 2,056 and 1,868 cells, respectively). Clonotype assignment is part of the  
190 output obtained by TraCeR<sup>34</sup> (Supplementary Table 7). Interestingly, only 55 out of  
191 1,895 cells at 3m were part of a clone. For 18m, 479 out of 2,056 cells were part of a  
192 clone and for 24m, 348 out of 1,780 cells were part of a clone, indicating again an  
193 increase in clonality of the T-cell repertoire at later ages. These changes in clonality for  
194 both B and T cell repertoires are noteworthy because they suggest that the immune  
195 system of a 24m mouse will be less likely to respond to new pathogens, corroborating  
196 literature suggesting that older individuals have higher vulnerability to new infections  
197 and lower benefits from vaccination<sup>35,36</sup>.

198

199 As a final example of how the Tabula Muris Senis can be used to discover how cell types  
200 change with age, we computed an overall diversity score to identify which cell types  
201 were more susceptible to changes with age (Extended Data Figure 10). The diversity  
202 score is computed as the Shannon entropy of the cluster assignment and then regressed  
203 against age to provide a p-value (see Methods). We observed significant changes in  
204 diversity affecting cells of the immune system originating from the brain and in the  
205 kidney (Figure 4c, Extended Data Figure 11a,b). These results were not confounded by  
206 the number of genes expressed per cell (Extended Data Figure 11c,d). We found that in  
207 brain myeloid microglial cells, the majority of young (3m) microglia occupy clusters 1  
208 and 6, while old (18m, 24m) microglia constitute the vast majority of cells in clusters 10,  
209 12 and 14 (Figure 4d). Trajectory analysis suggests that young microglia go through an  
210 intermediate state, represented by the clusters mostly occupied by 18m microglial cells  
211 before acquiring the signature of old microglia (Extended Data Figure 11e). Clusters 10,  
212 12 and 14 are mainly comprised of 18- and 24-month old microglia. These cells up-  
213 regulate MHC class I genes (H2-D1, H2-K1, B2m), along with genes associated with  
214 degenerative disease (e.g. Fth1)<sup>37,38</sup>. When contrasting with clusters 1 and 6, which  
215 contain mostly 3m microglia, clusters 10, 12 and 14 gene expression is enriched with  
216 interferon responsive or regulatory genes (e.g. Oasl2, Oasl1a, Ifit3, Rtp4, Bst2, Stat1, Irf7,  
217 Ifitm3, Usp18, Ifi204, Ifi2), suggesting an expansion of this small pro-inflammatory  
218 subset of microglia in the aging brain<sup>39</sup>. Moreover, the list of differentially expressed  
219 genes between “young” and “old” clusters resembled the Alzheimer’s disease specific  
220 microglial signature previously reported<sup>37</sup>, with 55 out of the top 200 differential  
221 expressed genes being shared between the two differential gene expression lists (Figure  
222 4e; Supplementary Table 8). Regarding kidney macrophages, we found two clusters that  
223 remarkably changed their composition with age. Cluster 10 is primarily composed of  
224 cells of 1m- and 3-month old mice while cluster 13 is mostly composed of cells of 18-  
225 21-, 24- and 30-month old mice (Figure 4f). Differential gene expression revealed that  
226 cluster 10 is enriched for an M2-macrophage gene signature (e.g. Il10, H2-Eb1, H2-Ab1,  
227 H2-Aa, Cd74, C1qa, Cxcl16, Hexb, Cd81, C1qb, Cd72) while cluster 13 resembles a M1-  
228 proinflammatory macrophage state<sup>40</sup> (e.g. Hp, Itgal, Spex1, Gngt2) (Extended Data  
229 Figure 11f; Supplementary Table 8).

230

231 The Tabula Muris Senis is a comprehensive resource for the cell biology community  
232 which offers a detailed molecular and cell-type specific portrait of aging. We view such  
233 a cell atlas as an essential companion to the genome: the genome provides a blueprint for  
234 the organism but does not explain how genes are used in a cell type specific manner or  
235 how the usage of genes changes over the lifetime of the organism. The cell atlas provides  
236 a deep characterization of phenotype and physiology which can serve as a reference for  
237 understanding many aspects of the cell biological changes that mammals undergo during  
238 their lifespan.  
239

## 240 **Figure Legends**

### 241 **Figure 1. Overview of Tabula Muris Senis.**

242 **a**, 23 organs from 19 male and 11 female mice were analyzed at 6 different time points.  
243 The bar plot shows the number of sequenced cells per organ prepared by FACS (n=23  
244 organs) and microfluidic droplets (n=16 organs). For the droplet dataset the Fat  
245 subtissues were processed together (Fat = BAT+GAT+MAT+SCAT). **b**, Annotation  
246 workflow. Data were clustered together across all time points. We used the Tabula Muris  
247 (3m time point) as a reference for the automated pipeline and the annotations were  
248 manually curated by tissue experts. **c**, UMAP plot of all cells collected by FACS, colored  
249 by organ (Extended Data Figure 2c), overlaid with the Louvain cluster  
250 numbers; n = 110,824 individual cells. **d**, B cells (top) and endothelial cells (bottom)  
251 independently annotated for each organ cluster together by unbiased whole-transcriptome  
252 Louvain clustering, irrespectively of the organ they originate from. **e**, UMAP plot of all  
253 cells collected by droplet, colored by organ (Extended Data Figure 2c), overlaid with the  
254 Louvain cluster numbers; n = 245,389 individual cells. **f**, B cells (and endothelial cells)  
255 independently annotated for each organ cluster together by unbiased whole-transcriptome  
256 Louvain clustering, irrespectively of the organ where they were found.

257

258

### 259 **Figure 2. Cellular changes during aging.**

260 **a,b**, Bar plot showing the fractions of cells expressing Cdkn2a at each age group for  
261 FACS (**a**) and droplet (**b**). **c,d**, Bar plot of the median expression of Cdkn2a for the cells  
262 that do express the gene at each age group for FACS (**c**) and droplet (**d**). The p-value was  
263 obtained using a Mann-Whitney-Wilcoxon rank-sum two-sided test. **e**, Bladder cell (**left**)  
264 and bladder urothelial cell (**right**) relative abundances change significantly with age (p-  
265 value<0.05 and  $r^2>0.7$  for a hypothesis test whose null hypothesis is that the slope is zero,  
266 using two-sided Wald Test with t-distribution of the test statistic). **f,g**, Top 10 upregulated  
267 and downregulated genes in bladder FACS (**f**) and droplet (**g**) using age as a continuous  
268 covariate while controlling for sex. Genes were classified as significant under an FDR  
269 threshold of 0.01 and an age coefficient threshold of 0.005 (corresponding to ~10% fold  
270 change). **h**, Kidney capillary endothelial cell (**top-left**), mesangial cell (**top-right**), loop  
271 of Henle ascending limb epithelial cell (**bottom-left**) and loop of Henle thick ascending  
272 limb epithelial cell (**bottom-right**) relative abundances change significantly with age (p-  
273 value<0.05 and  $r^2>0.7$  for a hypothesis test whose null hypothesis is that the slope is zero,  
274 using two-sided Wald Test with t-distribution of the test statistic). **i,j**, Top 10 upregulated  
275 and downregulated genes in kidney FACS (**i**) and droplet (**j**) using age as a continuous  
276 covariate while controlling for sex. Genes were classified as significant under an FDR  
277 threshold of 0.01 and an age coefficient threshold of 0.005 (corresponding to ~10% fold  
278 change). **k**, Spleen plasma cell (**left**) and T cell (**right**) relative abundances change  
279 significantly with age (p-value<0.05 and  $r^2>0.7$  for a hypothesis test whose null  
280 hypothesis is that the slope is zero, using two-sided Wald Test with t-distribution of the  
281 test statistic). **l,m**, Top 10 upregulated and downregulated genes in spleen FACS (**l**) and  
282 droplet (**m**) using age as a continuous covariate while controlling for sex. Genes were  
283 classified as significant under an FDR threshold of 0.01 and an age coefficient threshold  
284 of 0.005 (corresponding to ~10% fold change).

285

286

287

288 **Figure 3. Mutational burden across tissues in the aging mice.**

289 Distribution of the difference of the mean mutation in the gene set (and ERCC spike-in  
290 controls) per cell between 24m and 3m and 18m and 3m for all tissues and cells (**a**) and  
291 with the cell types split in five functional groups, endothelial (**b**), immune (**c**),  
292 parenchymal (**d**), stem/progenitor cell (**e**) and stromal (**f**).

293

294

295 **Figure 4. The aging immune system.**

296 **a**, B-cell clonal families. The pie chart shows the proportion of singleton B cells and B  
297 cells that are part of clonal families at 3m, 18m and 24m. For each time point, the clonal  
298 families are represented in a tree structure for which the central node is age. Connected to  
299 the age node there is an additional node (dark gray) that represents each animal and the  
300 clonal families are depicted for each animal. For each clonal family, cells that are part of  
301 that family are colored by the organ of origin. **b**, T-cell clonal families. The pie chart  
302 shows the proportion of singleton T cells and T cells that are part of clonal families at  
303 3m, 18m and 24m. For each time point, clonal families are represented in a tree structure  
304 for which the central node is age. Connected to the age node there is an additional node  
305 (dark gray) that represents each animal and the clonal families are depicted for each  
306 animal. For each clonal family, cells that are part of that family are colored by the organ  
307 of origin. **c**, Diversity score for the two cell types that significantly change with age. **d**,  
308 UMAP plot of the brain myeloid microglial cell Leiden clusters (numbers) colored by  
309 age. Faded clusters do not change their relative age cell composition; colored clusters  
310 change their relative cell composition. **e**, UMAP plot of the brain myeloid microglial  
311 cells when scored using the microglia Alzheimer's disease signature (Supplementary  
312 Table 8). **f**, UMAP plot of the kidney macrophage Leiden clusters (numbers) colored by  
313 age group.

314

315

316

317

318 **Extended Data Figure Legends**

319 **Extended Data Figure 1. Overview of Tabula Muris Senis (cont.)**

320 **a,b**, UMAP plot of all cells collected for FACS colored by tissue (**a**) or age (**b**). **c**, Pie  
321 chart with the summary statistics for FACS. **d,e**, UMAP plot of all cells collected for  
322 droplet colored by tissue (**d**) or age (**e**). **f**, Pie chart with the summary statistics for  
323 droplet.

324

325

326 **Extended Data Figure 2. Overview of Tabula Muris Senis (cont.)**

327 **a**, Balloon plot showing the number of sequenced cells per sequencing method per organ  
328 per sex per age. **b**, Schematic analysis workflow. **c,d**, Tabula Muris Senis color  
329 dictionary for organs and tissues (**c**) and ages (**d**).

330

331



332 **Extended Data Figure 3. Comparison of bulk and single-cell datasets.** Aging patterns  
333 from bulk and single-cell data are consistent. Strong changes in bulk gene expression  
334 with aging can be either explained by cell or read count-based changes in single-cell data  
335 FACS (a) and droplet (b). Wilcoxon–Mann–Whitney indicates that single-cell data based  
336  $\log_2$  fold-changes of cell or read counts distinguish between up and down regulated genes  
337 in bulk data.

338

339

340 **Extended Data Figure 4. Tissue cell compositions. a-p,** Alphabetically sorted tissue bar  
341 plot showing the relative abundances of cell types in each tissue across the entire age  
342 range for the droplet dataset. The tissue cell composition is also available at our online  
343 browser [tabula-muris-senis.ds.czbiohub.org](http://tabula-muris-senis.ds.czbiohub.org)

344

345

346

347 **Extended Data Figure 5. Cellular changes during aging in the liver.**

348 a, Liver hepatocyte relative abundances change significantly with age (p-value<0.05 and  
349  $r^2>0.7$  for a hypothesis test whose null hypothesis is that the slope is zero, using two-  
350 sided Wald Test with t-distribution of the test statistic). b,c, Top 10 upregulated and  
351 downregulated genes in liver FACS (b) and droplet (c) using age as a continuous  
352 covariate while controlling for sex. Genes were classified as significant under an FDR  
353 threshold of 0.01 and an age coefficient threshold of 0.005 (corresponding to ~10% fold  
354 change). d-g, Staining of Kupffer cells across age (d) and respective quantification (e-g).  
355 h-k, Staining of liver endothelial cells across ages (h) and respective quantification (i-k).  
356 The white scale bar corresponds to 100 $\mu$ m.

357

358

359 **Extended Data Figure 6. Cellular changes during aging (cont.)**

360 a, Mammary gland T cell relative abundances change significantly with age (p-  
361 value<0.05 and  $r^2>0.7$  for a hypothesis test whose null hypothesis is that the slope is zero,  
362 using two-sided Wald Test with t-distribution of the test statistic). b,c, Top 10  
363 upregulated and downregulated genes in mammary gland FACS (b) and droplet (c) using  
364 age as a continuous covariate while controlling for sex. Genes were classified as  
365 significant under an FDR threshold of 0.01 and an age coefficient threshold of 0.005  
366 (corresponding to ~10% fold change). d, Marrow precursor B cell relative abundances  
367 change significantly with age (p-value<0.05 and  $r^2>0.7$  for a hypothesis test whose null  
368 hypothesis is that the slope is zero, using two-sided Wald Test with t-distribution of the  
369 test statistic). e,f, Top 10 upregulated and downregulated genes in marrow FACS (e) and  
370 droplet (f) using age as a continuous covariate while controlling for sex. Genes were  
371 classified as significant under an FDR threshold of 0.01 and an age coefficient threshold  
372 of 0.005 (corresponding to ~10% fold change). g, Skin keratinocyte stem cell relative  
373 abundances change significantly with age (p-value<0.05 and  $r^2>0.7$  for a hypothesis test  
374 whose null hypothesis is that the slope is zero, using two-sided Wald Test with t-  
375 distribution of the test statistic). h, Top 10 upregulated and downregulated genes in skin  
376 FACS using age as a continuous covariate while controlling for sex. Genes were

377 classified as significant under an FDR threshold of 0.01 and an age coefficient threshold  
378 of 0.005 (corresponding to ~10% fold change).

379

380

381 **Extended Data Figure 7. Mutational burden across tissues in the aging mice (cont.**  
382 **24m vs 3m).**

383 **a,b**, Mean number of somatic mutations (**a**) and raw expression (**b**) across all tissues per  
384 age group (3m and 24m). **c,d**, Mean number of mutations in ERCC spike-in (**c**) and  
385 ERCC raw expression (**d**) across all tissues per age group (3m and 24m). Mutations are  
386 presented as the mean number of mutations per gene per cell.

387

388

389 **Extended Data Figure 8. Mutational burden across tissues in the aging mice (cont.**  
390 **18m vs 3m).**

391 **a,b**, Mean number of somatic mutations (**a**) and raw expression (**b**) across all tissues per  
392 age group (3m and 18m). **c,d**, Mean number of mutations in ERCC spike-in (**c**) and  
393 ERCC raw expression (**d**) across all tissues per age group (3m and 18m). Mutations are  
394 presented as the mean number of mutations per gene per cell.

395

396

397 **Extended Data Figure 9. Mutational burden across tissues in the aging mice (cont.**  
398 **24m vs 18m).**

399 **a,b**, Mean number of somatic mutations (**a**) and raw expression (**b**) across all tissues per  
400 age group (18m and 24m). **c,d**, Mean number of mutations in ERCC spike-in (**c**) and  
401 ERCC raw expression (**d**) across all tissues per age group (18m and 24m). Mutations are  
402 presented as the mean number of mutations per gene per cell.

403

404

405 **Extended Data Figure 10. Diversity score summary.**

406 **a,b**, Heatmap summary of the overall tissue diversity score for FACS (**a**) and droplet (**b**).  
407 **c,d**, Heatmap summary of the tissue cell-type diversity score for FACS (**c**) and droplet  
408 (**d**).

409

410

411 **Extended Data Figure 11. The aging immune system (cont.)**

412 **a,b**, Diversity score at different cluster resolutions for FACS brain myeloid microglia cell  
413 (**a**) and droplet kidney macrophage (**b**). **c,d**, Diversity score correlation with the number  
414 of genes expressed per tissue (**c**) or tissue cell-type (**d**). **e**, PAGA<sup>41</sup> trajectory for brain  
415 myeloid microglia cell. **f**, Differential gene expression analysis of cluster 10 (mostly  
416 young macrophages) versus clusters 13 (mostly old macrophages). For the complete gene  
417 list please refer to Supplementary Table 8.

418

419

420

421

422 **Supplementary Figure Legends**

423 **Supplementary Figure 1. FACS sequencing statistics.**

424 **a**, Box plot of the number of genes detected per cell for each organ and age. **b**, Box plot  
425 of the number of reads per cell (log-scale) for each organ and age.

426

427 **Supplementary Figure 2. Droplet sequencing statistics.**

428 Box plot of the number of genes detected per cell for each organ and age.

429

430 **Supplementary Figure 3. Droplet sequencing statistics (cont.)**

431 Box plot of the number of UMIs per cell (log-scale) for each organ and age.

432

433

434

435

436 **Supplementary Tables**

437 **Supplementary Table 1. Summary of the FACS dataset.**

438 **a**, Number of cells grouped by age, sex, mouse id and tissue. **b**, Number of cells grouped  
439 by tissue, cell ontology class and age. **c**, Number of cells grouped by Louvain cluster  
440 number, cell ontology class, tissue and age. **d**, Number of cells grouped by cell ontology  
441 class, Louvain cluster number, tissue and age. **e**, Fraction of cells in each Louvain cluster  
442 per cell ontology class and tissue. **f**, Fraction of cells in each Louvain cluster per tissue. **g**,  
443 Fraction of cells in each Louvain cluster per cell ontology class.

444

445 **Supplementary Table 2. Summary of the droplet dataset.**

446 **a**, Number of cells grouped by age, sex, mouse id and tissue. **b**, Number of cells grouped  
447 by tissue, cell ontology class and age. **c**, Number of cells grouped by Louvain cluster  
448 number, cell ontology class, tissue and age. **d**, Number of cells grouped by cell ontology  
449 class, Louvain cluster number, tissue and age. **e**, Fraction of cells in each Louvain cluster  
450 per cell ontology class and tissue. **f**, Fraction of cells in each Louvain cluster per tissue. **g**,  
451 Fraction of cells in each Louvain cluster per cell ontology class.

452

453 **Supplementary Table 3. Cellular fraction changes.** This supplementary table supports  
454 Figure 2e,h,k; Extended Data Figure 4; Extended Data Figure 5a and Extended Data  
455 Figure 6a,d,g.

456

457 **Supplementary Table 4. Differential gene expression analysis.** This supplementary  
458 table supports Figure 2f,g,i,j,l,m; Extended Data Figure 5b,c and Extended Data Figure  
459 6b,c,e,f,h.

460

461 **Supplementary Table 5. Quantification of Liver in-situ staining.** This supplementary  
462 table supports Figure 5d-k. fov stands for field of view.

463

464 **Supplementary Table 6. Summary statistics for the GATK analysis.** **Cell** is the  
465 unique cell identifier; **ercc** is the average number of mutations per cell found in the  
466 ERCC spike-in, **adata** is the average number of mutations per cell in the gene set of the  
467 tissue; **ercc\_raw\_counts** are the average number of ERCC spike-in counts per cell and  
468 **ercc\_counts** are the  $\log(\text{ercc\_raw\_counts}+1)$ ; **adata\_raw\_counts** are the average  
469 number of gene counts per cell and **adata\_counts** are the  $\log(\text{adata\_raw\_counts}+1)$ ;  
470 **tissue**, **age** and **cell\_ontology\_class** are the metadata of the respective cell id and  
471 **agenum** is the age as a numerical variable; **functional\_annotations** is a categorical  
472 variable binning each cell type as endothelial, immune, parenchymal, stem  
473 cell/progenitor or stromal.

474  
475 **Supplementary Table 7. B-cell and T-cell repertoire analysis raw data.** This table  
476 supports Figure 4a,b.

477  
478 **Supplementary Table 8. Differential gene expression for the tissue cell type whose**  
479 **diversity significantly changes with age.** **a**, FACS brain myeloid microglia  
480 differentially upregulated genes between clusters 10, 12 and 14 versus clusters 1 and 6. **b**,  
481 FACS brain myeloid microglia differentially upregulated genes between clusters 1 and 6  
482 versus clusters 10, 12 and 14. **c**, Droplet kidney macrophage differentially upregulated  
483 genes between cluster 13 and cluster 10. **d**, Droplet kidney macrophage differentially  
484 upregulated genes between cluster 10 and cluster 13. **e**, Alzheimer's disease microglia  
485 signature from<sup>37</sup>. This table supports Figure 4d,e and Extended Data Figure 11f.

486  
487  
488  
489  
490  
491

## 492 **Methods**

493 All data, protocols, analysis scripts and an interactive data browser are publicly available.

494

495

## 496 **Experimental Procedures**

### 497 **Mice and organ collection**

498 Male and virgin female C57BL/6JN mice were shipped from the National Institute on  
499 Aging colony at Charles River (housed at 67–73 °F) to the Veterinary Medical Unit  
500 (VMU; housed at 68–76 °F) at the VA Palo Alto (VA). At both locations, mice were  
501 housed on a 12-h light/dark cycle and provided food and water *ad libitum*. The diet at  
502 Charles River was NIH-31, and Teklad 2918 at the VA VMU. Littermates were not  
503 recorded or tracked, and mice were housed at the VA VMU for no longer than 2 weeks  
504 before euthanasia, with the exception of mice older than 18 months, which were  
505 housed at the VA VMU beginning at 18 months of age. Before tissue collection, mice  
506 were placed in sterile collection chambers at 8 am for 15 min to collect fresh fecal  
507 pellets. After anaesthetization with 2.5% v/v Avertin, mice were weighed, shaved, and  
508 blood was drawn via cardiac puncture before transcatheterial perfusion with 20 ml PBS.  
509 Mesenteric adipose tissue was then immediately collected to avoid exposure to the  
510 liver and pancreas perfusate, which negatively affects cell sorting. Isolating viable  
511 single cells from both the pancreas and the liver of the same mouse was not possible;  
512 therefore, two males and two females were used for each. Whole organs were then  
513 dissected in the following order: large intestine, spleen, thymus, trachea, tongue, brain,  
514 heart, lung, kidney, gonadal adipose tissue, bladder, diaphragm, limb muscle (tibialis  
515 anterior), skin (dorsal), subcutaneous adipose tissue (inguinal pad), mammary glands  
516 (fat pads 2, 3 and 4), brown adipose tissue (interscapular pad), aorta and bone marrow  
517 (spine and limb bones). Organ collection concluded by 10 am. After single-cell  
518 dissociation as described below, cell suspensions were either used for FACS of  
519 individual cells into 384-well plates, or for preparation of the microfluidic droplet  
520 library. All animal care and procedures were carried out in accordance with  
521 institutional guidelines approved by the VA Palo Alto Committee on Animal Research.

522

### 523 **Tissue dissociation and sample preparation**

524 All tissues were processed as previously described<sup>5</sup>.

525

### 526 **Sample size, randomization and blinding**

527 No sample size choice was performed before the study. Randomization and blinding  
528 were not performed: the authors were aware of all data and metadata-related variables  
529 during the entire course of the study.

530

### 531 **Single-cell methods**

532 All protocols used in this study are described in detail elsewhere<sup>5</sup>. Those include: i)  
533 preparation of lysis plates, ii) FACS sorting, iii) cDNA synthesis using the Smart-seq2  
534 protocol<sup>42,43</sup>, iv) library preparation using an in-house version of Tn5<sup>44,45</sup>, v) library  
535 pooling and Quality control and vi) sequencing. For further details please refer to  
536 <http://dx.doi.org/10.17504/protocols.io.2uwgexe>

537

538

### 539 **Microfluidic droplet single-cell analysis**

540 Single cells were captured in droplet emulsions using the GemCode Single-Cell  
541 Instrument (10x Genomics) and scRNA-seq libraries were constructed as per the 10x  
542 Genomics protocol using GemCode Single-Cell 3' Gel Bead and Library V2 Kit. In  
543 brief, single cell suspensions were examined using an inverted microscope, and if  
544 sample quality was deemed satisfactory, the sample was diluted in PBS with 2% FBS  
545 to a concentration of 1000 cells per  $\mu$ l. If cell suspensions contained cell aggregates or  
546 debris, two additional washes in PBS with 2% FBS at 300g for 5 min at 4 °C were  
547 performed. Cell concentration was measured either with a Moxi GO II (Orflo  
548 Technologies) or a haemocytometer. Cells were loaded in each channel with a target  
549 output of 5,000 cells per sample. All reactions were performed in the Biorad C1000  
550 Touch Thermal cycler with 96-Deep Well Reaction Module. 12 cycles were used for  
551 cDNA amplification and sample index PCR. Amplified cDNA and final libraries were  
552 evaluated on a Fragment Analyzer using a High Sensitivity NGS Analysis Kit  
553 (Advanced Analytical). The average fragment length of 10x cDNA libraries was  
554 quantitated on a Fragment Analyzer (AATI), and by qPCR with the Kapa Library  
555 Quantification kit for Illumina. Each library was diluted to 2 nM, and equal volumes of  
556 16 libraries were pooled for each NovaSeq sequencing run. Pools were sequenced with  
557 100 cycle run kits with 26 bases for Read 1, 8 bases for Index 1, and 90 bases for Read  
558 2 (Illumina 20012862). A PhiX control library was spiked in at 0.2 to 1%. Libraries  
559 were sequenced on the NovaSeq 6000 Sequencing System (Illumina).

560

561

### 562 **Computational methods**

#### 563 **Data extraction**

564 Sequences from the NovaSeq were de-multiplexed using bcl2fastq version 2.19.0.316.  
565 Reads were aligned using to the mm10plus genome using STAR version 2.5.2b with  
566 parameters TK. Gene counts were produced using HTSEQ version 0.6.1p1 with  
567 default parameters, except 'stranded' was set to 'false', and 'mode' was set to  
568 'intersection-nonempty'. Sequences from the microfluidic droplet platform were de-  
569 multiplexed and aligned using CellRanger version 2.0.1, available from 10x Genomics  
570 with default parameters.

571

#### 572 **Data pre-processing**

573 Gene count tables were combined with the metadata variables using the Scanpy<sup>46</sup>  
574 Python package version 1.4. We removed genes not expressed in at least 3 cells and  
575 then cells that did not have at least 250 detected genes. For FACS we removed cells  
576 with less than 5000 counts and for droplet cells with less than 2500 UMIs. The data  
577 was then normalized using size factor normalization such that every cell has 10,000  
578 counts and log transformed. We computed highly variable genes using default  
579 parameters and then scaled the data to a maximum value of 10. After we computed  
580 PCA, neighborhood graph and clustered the data using Louvain<sup>6</sup> and Leiden<sup>7</sup> methods.  
581 The data was visualized using UMAP projection. Step-by-step instructions to  
582 reproduce the pre-processing of the data are available from GitHub.

583

## 584 **Cell type annotation**

585 To define cell types we analyzed each organ independently but combining all ages. In a  
586 nutshell, we performed principal component analysis on the most variable genes between  
587 cells, followed by Louvain and Leiden graph-based clustering. Next we subset the data  
588 for 3m (Tabula Muris<sup>5</sup>) and compute how many cell types map to each individual cluster.  
589 For the clusters that we had a single 1:1 mapping (cluster:cell type) we propagate the  
590 annotations for all ages; in case there is a 1:many mapping we flagged that cluster for  
591 manual validation. Step-by-step instructions to reproduce this method are available from  
592 GitHub. For each cluster, we provide annotations in the controlled vocabulary of the cell  
593 ontology<sup>47</sup> to facilitate inter-experiment comparisons. Using this method, we were able to  
594 annotate automatically (~1min per tissue) over 70% of the dataset. The automatic  
595 annotations were then reviewed by each of the tissue experts leading to a fully curated  
596 dataset for all the cell types in Tabula Muris Senis.

597

## 598 **Tissue cell composition analysis**

599 For each tissue and age, we computed the relative proportion of each cell type. Next we  
600 used `scipy.stats.linregress` to regress the relative tissue-cell type changes against age  
601 and considered significant the changes with  $p\text{-value} < 0.05$  for a hypothesis test whose null  
602 hypothesis is that the slope is zero, using two-sided Wald Test with t-distribution of the  
603 test statistic and a  $r^2 > 0.5$ .

604

## 605 **Differential gene expression**

606 We performed differential gene expression analysis on each tissue with a well-powered  
607 sample size (>100 cells in both young (1m and 3m) and old age group (18m, 21m, 24m  
608 and 30m)). We use a linear model<sup>48</sup> treating age as a numerical variable while controlling  
609 for sex. We apply a false-discovery rate (FDR) threshold of 0.01 and an age coefficient  
610 threshold of 0.005 (corresponding to ~10% fold change).

611

## 612 **In Situ RNA Hybridization and quantification.**

613 *In situ* RNA hybridization was performed using the Advanced Cell Diagnostics  
614 RNAscope® Multiplex Fluorescent Detection kit v2 (323110, Bio-technie) according to  
615 the manufacturer's instructions. Staining of mouse liver specimens was performed using  
616 5µm paraffin-embedded thick sections. Mouse livers were fixed in 10% formalin buffer  
617 saline (HT501128, Sigma Aldrich) for 24h at room temperature before paraffin  
618 embedding. For multiplex staining the following probes were used; *Clec4f* (Mm-Clec4f  
619 480421, *Il1b* (Mm-Il1b 316891-C2), *Pecam1* (Mm-Pecam-1 316721), *Mrc1* (Mm-Mrc1  
620 437511-C3). Slides were counter stained with Prolong gold antifade reagent with DAPI  
621 (P36931, Life technologies). Mounted slides were imaged on a Leica DM6 B fluorescent  
622 microscope (Leica Biosystems). Image quantification was performed using the starfish  
623 open source image-based transcriptomics pipeline (please refer to Starfish: Open Source  
624 Image Based Transcriptomics and Proteomics Tools available from  
625 <http://github.com/spacetx/starfish> and <sup>49</sup>).

626

## 627 **Comparison between bulk and single-cell datasets**

628 The differential gene analysis was defined on a per tissue basis. First, we investigated  
629 genes based on the single-cell data. We only considered cells from male animals and

630 perform our analysis on the  $\log(1 + \text{CPM})$  transformed single-cell count matrices. Note  
631 that normalization of the single-cell data was done on a per cell basis. We defined two  
632 group of cells based on age: young cells with age  $\leq 3$  months (Y) and old cells with age  
633  $> 3$  months (O). For each gene we compute the  $\log_2$  fold-change of cell and read counts  
634 between O and Y. We defined cell count as the fraction of cells that express the gene.  
635 Similarly, we defined read count as the mean read count of the gene in the cells that  
636 express it. The calculated  $\log_2$  fold-changes of a gene reflect its expression changes with  
637 aging within the single-cell data. Next we analyze each gene based on the bulk data. We  
638 computed the Spearman (Sp) correlation of bulk DESeq2 normalized gene expression  
639 with aging. We defined two groups of genes based on the bulk data, increasing with age  
640  $\text{Sp} > 0.7$  (U) and decreasing with age  $\text{Sp} < -0.7$  (D). Finally, we compared the single-cell  
641 data based  $\log_2$  fold-changes between the bulk data defined groups U and D. Specifically,  
642 we run Wilcoxon–Mann–Whitney test in order to understand if  $\log_2$  fold-changes of cell  
643 or read counts could distinguish between the two groups. We used the U statistic for  
644 effect size.

645

#### 646 **T-Cell processing**

647 We used TraCeR<sup>34</sup> version 0.5 to identify T-Cell clonal populations. We ran tracer  
648 assemble with `--species Mmus` set. We then ran tracer summarise with `--species Mmus`  
649 to create the final results. We used the following versions for TraCeR dependencies:  
650 igblast version 1.7.0, kallisto version v0.43.1, Salmon version 0.8.2, Trinity version  
651 v2.4.0, GRCm38 reference genome. Step-by-step instructions to reproduce the  
652 processing of the data are available from GitHub.

653

#### 654 **B-Cell processing**

655 We used singlecell-ige<sup>33</sup> version eafb6d126cc2d6511faae3efbd442abd7c6dc8ef  
656 (<https://github.com/dcroote/singlecell-ige>) to identify B-Cell clonal populations. We  
657 used the default configuration settings except we set the species to mouse. Step-by-step  
658 instructions to reproduce the processing of the data are available from GitHub.

659

#### 660 **Mutation analysis**

661 We used samtools<sup>50</sup> version 1.9 and GATK<sup>29</sup> version v4.1.1.0 for mutation analysis.  
662 We used samtools faidx to create our index file. Then we used GATK  
663 CreateSequenceDictionary and GRCm38, as the reference, to create our sequence  
664 dictionary. Next we used GATK AddOrReplaceReadGroups to create a single read  
665 group using parameters `-RGID 4 -RGLB lib1 -RGPL illumina -RGPU unit1 -RGSM`  
666 `20`. Finally we used GATK HaplotypeCaller to call the mutations. We disabled the  
667 following read filters: MappingQualityReadFilter, GoodCigarReadFilter,  
668 NotSecondaryAlignmentReadFilter, MappedReadFilter,  
669 MappingQualityAvailableReadFilter, NonZeroReferenceLengthAlignmentReadFilter,  
670 NotDuplicateReadFilter, PassesVendorQualityCheckReadFilter, and  
671 WellformedReadFilter, but kept all other default settings. The results were  
672 summarized per gene in the form of a mutation count per cell table. We started by  
673 removing genes mutated in over 60% of cells, to eliminate the possible bias of  
674 germline mutations. Then for each tissue we selected genes expressed in at least 75%  
675 of the cells for all the time points to avoid confounding the mutation results with



676 differential gene expression associated with age. Next we computed the average  
677 number of mutations in the gene set (or ERCC spike-in controls) per cell and also the  
678 average number of raw counts (Supplementary Table 6) and plotted the different  
679 distributions. Step-by-step instructions to reproduce the processing of the data are  
680 available from GitHub.

681

### 682 **Diversity score**

683 The raw FACS or droplet dataset were used as the input. We filtered genes expressed  
684 in fewer than 5 cells, filtered cells if expressing fewer than 500 genes and discarded  
685 cells with total number of counts less than 5000. Next we performed size factor  
686 normalization such that every cell had 1e4 counts and performed a log<sub>1p</sub>  
687 transformation. This was followed by clustering, where we clustered every tissue and  
688 every tissue-cell type for every mouse separately using 6 different configurations:  
689 resolution parameters (0.3, 0.5, 0.7) \* clustering method (Louvain, Leiden). This is to  
690 provide a robust clustering result. For each combination (each tissue-mouse and each  
691 tissue-cell\_type-mouse), we computed the clustering diversity score as the Shannon  
692 entropy of the cluster assignment. We then regressed the diversity score against age to  
693 detect the systematic increase/decrease of clustering diversity with respect to age. FDR  
694 was used to correct for multiple comparisons. A tissue or a tissue-cell type was  
695 selected if the slope was consistent (having the same sign) in all 6 clustering  
696 configurations and at least 2 out of 6 clustering configurations had FDR<0.3. For each  
697 selected tissue or tissue-cell type, a separate UMAP was computed using cells from all  
698 mice for visualization using Leiden clustering with resolution parameter 0.7.

699

### 700 **Code availability**

701 All code used for analysis is available on GitHub ([https://github.com/czbiohub/tabula-](https://github.com/czbiohub/tabula-muris-senis)  
702 [muris-senis](https://github.com/czbiohub/tabula-muris-senis))

703

### 704 **Interactive Data Browsers**

705 [tabula-muris-senis.ds.czbiohub.org](http://tabula-muris-senis.ds.czbiohub.org)

706 <https://tabula-maris-senis.cells.ucsc.edu>

707

708

709

710 **References**

711

712 1. López-Otín, C., Blasco, M. A., Partridge, L., Serrano, M. & Kroemer, G. The  
713 Hallmarks of Aging. *Cell* **153**, 1194–1217 (2013).

714

715 2. Nikolich-Žugich, J. The twilight of immunity: emerging concepts in aging of the  
716 immune system. *Nat Immunol* **19**, 10–19 (2018).

717

718 3. Campisi, J. Aging, Cellular Senescence, and Cancer. *Annu Rev Physiol* **75**, 685–705  
719 (2013).

720

721 4. Vijg, J. & Suh, Y. Genome Instability and Aging. *Physiology* **75**, 645–668 (2013).

722

723 5. The Tabula Muris Consortium. Single-cell transcriptomics of 20 mouse organs creates  
724 a Tabula Muris. *Nature* **562**, 367–372 (2018).

725

726 6. Blondel, V. D., Guillaume, J.-L., Lambiotte, R. & Lefebvre, E. Fast unfolding of  
727 communities in large networks. (2008). doi:10.1088/1742-5468/2008/10/p10008

728

729 7. Traag, V., Waltman, L. & van Eck, N. From Louvain to Leiden: guaranteeing well-  
730 connected communities. *Sci Rep-uk* **9**, 5233 (2019).

731

732 8. Schaum, N. *et al.* The murine transcriptome reveals global aging nodes with organ-  
733 specific phase and amplitude. *Biorxiv* 662254 (2019). doi:10.1101/662254

734

735 9. Rayess, H., Wang, M. B. & Vatsan, E. S. Cellular senescence and tumor suppressor  
736 gene p16. *Int J Cancer* **130**, 1715–1725 (2012).

737

738 10. Hernandez-Segura, A., Nehme, J. & Demaria, M. Hallmarks of Cellular Senescence.  
739 *Trends Cell Biol* **28**, 436–453 (2018).

740

741 11. van den Brink, S. C. *et al.* Single-cell sequencing reveals dissociation-induced gene  
742 expression in tissue subpopulations. *Nat Methods* **14**, 935–936 (2017).

743

744 12. Tung, P.-Y. *et al.* Batch effects and the effective design of single-cell gene expression  
745 studies. *Sci Rep-uk* **7**, 39921 (2017).

746

747 13. Nguyen, Q. H., Pervolarakis, N., Nee, K. & Kessenbrock, K. Experimental  
748 Considerations for Single-Cell RNA Sequencing Approaches. *Frontiers Cell Dev Biology*  
749 **06**, 108 (2018).

750

751 14. Daly, D. M. *et al.* Age-related changes in afferent pathways and urothelial function  
752 in the male mouse bladder. *J Physiology* **592**, 537–549 (2014).

753

754 15. Burmeister, D. M., AbouShwareb, T., Bergman, C. R., Andersson, K.-E. & Christ, G.

- 755 J. Age-Related Alterations in Regeneration of the Urinary Bladder after Subtotal  
756 Cystectomy. *Am J Pathology* **183**, 1585–1595 (2013).  
757
- 758 16. Andersson, K.-E., Boedtkjer, D. B. & Forman, A. The link between vascular  
759 dysfunction, bladder ischemia, and aging bladder dysfunction. *Ther Adv Urology* **9**, 11–  
760 27 (2017).  
761
- 762 17. Suskind, A. M. The Aging Overactive Bladder: a Review of Aging-Related Changes  
763 from the Brain to the Bladder. *Curr Bladder Dysfunct Reports* **12**, 42–47 (2017).  
764
- 765 18. Zhang, D. *et al.* Downregulation of ATP1A1 promotes cancer development in renal  
766 cell carcinoma. *Clin Proteom* **14**, 15 (2017).  
767
- 768 19. Isaka, Y. Epidermal growth factor as a prognostic biomarker in chronic kidney  
769 diseases. *Ann Transl Medicine* **4**, S62–S62 (2016).  
770
- 771 20. Devuyst, O., Olinger, E. & Rampoldi, L. Uromodulin: from physiology to rare and  
772 complex kidney disorders. *Nat Rev Nephrol* **13**, 525–544 (2017).  
773
- 774 21. Tokonami, N. *et al.* Uromodulin is expressed in the distal convoluted tubule, where it  
775 is critical for regulation of the sodium chloride cotransporter NCC. *Kidney Int* **94**, 701–  
776 715 (2018).  
777
- 778 22. Covarrubias, A. J. *et al.* Aging-related inflammation driven by cellular senescence  
779 enhances NAD consumption via activation of CD38+ pro-inflammatory macrophages.  
780 *Biorxiv* 609438 (2019). doi:10.1101/609438  
781
- 782 23. Tan, Q. *et al.* The Role of IL-1 Family Members and Kupffer Cells in Liver  
783 Regeneration. *Biomed Res Int* **2016**, 6495793 (2016).  
784
- 785 24. Gehrke, N. *et al.* Hepatocyte-specific deletion of IL1-RI attenuates liver injury by  
786 blocking IL-1 driven autoinflammation. *J Hepatol* **68**, 986–995 (2018).  
787
- 788 25. Liu, Y., Gardner, C. R., Laskin, J. D. & Laskin, D. L. Classical and alternative  
789 activation of rat hepatic sinusoidal endothelial cells by inflammatory stimuli. *Exp Mol*  
790 *Pathol* **94**, 160–167 (2013).  
791
- 792 26. Palmer, S., Albergante, L., Blackburn, C. C. & Newman, T. Thymic involution and  
793 rising disease incidence with age. *Proc National Acad Sci* **115**, 201714478 (2018).  
794
- 795 27. Shen, Q. *et al.* The AP-1 transcription factor regulates postnatal mammary gland  
796 development. *Dev Biol* **295**, 589–603 (2006).  
797
- 798 28. Girnius, N., Edwards, Y. J. & Davis, R. J. The cJUN NH2-terminal kinase (JNK)  
799 pathway contributes to mouse mammary gland remodeling during involution. *Cell Death*  
800 *Differ* **25**, 1702–1715 (2018).

- 801  
802 29. McKenna, A. *et al.* The Genome Analysis Toolkit: A MapReduce framework for  
803 analyzing next-generation DNA sequencing data. *Genome Res* **20**, 1297–1303 (2010).  
804  
805 30. DePristo, M. A. *et al.* A framework for variation discovery and genotyping using  
806 next-generation DNA sequencing data. *Nat Genet* **43**, 491 (2011).  
807  
808 31. Auwera, G. A. *et al.* From FastQ Data to High Confidence Variant Calls: The  
809 Genome Analysis Toolkit Best Practices Pipeline. *Current Protocols in Bioinformatics*  
810 11.10.1-11.10.33 (2013). doi:10.1002/0471250953.bi1110s43  
811  
812 32. Zook, J. M., Samarov, D., niel, J., Sen, S. K. & Salit, M. Synthetic Spike-in Standards  
813 Improve Run-Specific Systematic Error Analysis for DNA and RNA Sequencing. *Plos*  
814 *One* **7**, e41356 (2012).  
815  
816 33. Croote, D., Darmanis, S., Nadeau, K. C. & Quake, S. R. High-affinity allergen-  
817 specific human antibodies cloned from single IgE B cell transcriptomes. *Science* **362**,  
818 1306–1309 (2018).  
819  
820 34. Stubbington, M. J. *et al.* T cell fate and clonality inference from single-cell  
821 transcriptomes. *Nat Methods* **13**, nmeth.3800 (2016).  
822  
823 35. Goronzy, J. J. & Weyand, C. M. Understanding immunosenescence to improve  
824 responses to vaccines. *Nat Immunol* **14**, ni.2588 (2013).  
825  
826 36. Goronzy, J. J. & Weyand, C. M. Successful and Maladaptive T Cell Aging. *Immunity*  
827 **46**, 364–378 (2017).  
828  
829 37. Keren-Shaul, H. *et al.* A Unique Microglia Type Associated with Restricting  
830 Development of Alzheimer’s Disease. *Cell* **169**, 1276-1290.e17 (2017).  
831  
832 38. Li, Q. *et al.* Developmental Heterogeneity of Microglia and Brain Myeloid Cells  
833 Revealed by Deep Single-Cell RNA Sequencing. *Neuron* **101**, 207-223.e10 (2019).  
834  
835 39. Hammond, T. R. *et al.* Single-Cell RNA Sequencing of Microglia throughout the  
836 Mouse Lifespan and in the Injured Brain Reveals Complex Cell-State Changes. *Immunity*  
837 **50**, 253-271.e6 (2019).  
838  
839 40. Jablonski, K. A. *et al.* Novel Markers to Delineate Murine M1 and M2 Macrophages.  
840 *Plos One* **10**, e0145342 (2015).  
841  
842 41. Wolf, A. F. *et al.* PAGA: graph abstraction reconciles clustering with trajectory  
843 inference through a topology preserving map of single cells. *Genome Biol* **20**, 59 (2019).  
844  
845 42. Picelli, S. *et al.* Smart-seq2 for sensitive full-length transcriptome profiling in single  
846 cells. *Nat Methods* **10**, nmeth.2639 (2013).

847

848 43. Darmanis, S. *et al.* A survey of human brain transcriptome diversity at the single cell  
849 level. *Proc National Acad Sci* **112**, 7285–7290 (2015).

850

851 44. Picelli, S. *et al.* Tn5 transposase and tagmentation procedures for massively scaled  
852 sequencing projects. *Genome Res* **24**, 2033–2040 (2014).

853

854 45. Hennig, B. P. *et al.* Large-Scale Low-Cost NGS Library Preparation Using a Robust  
855 Tn5 Purification and Tagmentation Protocol. *G3 Genes Genomes Genetics* **8**, 79–89  
856 (2018).

857

858 46. Wolf, A. F., Angerer, P. & Theis, F. J. SCANPY: large-scale single-cell gene  
859 expression data analysis. *Genome Biol* **19**, 15 (2018).

860

861 47. Diehl, A. D. *et al.* The Cell Ontology 2016: enhanced content, modularization, and  
862 ontology interoperability. *J Biomed Semant* **7**, 44 (2016).

863

864 48. Finak, G. *et al.* MAST: a flexible statistical framework for assessing transcriptional  
865 changes and characterizing heterogeneity in single-cell RNA sequencing data. *Genome*  
866 *Biol* **16**, 278 (2015).

867

868 49. McQuin, C. *et al.* CellProfiler 3.0: Next-generation image processing for biology.  
869 *Plos Biol* **16**, e2005970 (2018).

870

871 50. Li, H. *et al.* The Sequence Alignment/Map format and SAMtools. *Bioinformatics* **25**,  
872 2078–2079 (2009).

873

874

875

876

877

878

879 **Supplementary Information** is available in the online version of the paper.

880

881

882 **Acknowledgements** We thank Sony Biotechnology for making an SH800S instrument  
883 available for this project. Some cell sorting/flow cytometry analysis for this project was  
884 done on a Sony SH800S instrument in the Stanford Shared FACS Facility. Some  
885 fluorescence activated cell sorting (FACS) was done with instruments in the VA Flow  
886 Cytometry Core, which is supported by the US Department of Veterans Affairs (VA),  
887 Palo Alto Veterans Institute for Research (PAVIR), and the National Institutes of Health  
888 (NIH). We would like to thank Bruno Tojo for helping with the artwork.

889

890

### 891 **Author Contributions**

892 **Overall Coordination:** Angela Oliveira Pisco<sup>1</sup>, Aaron McGeever<sup>1</sup>, Nicholas Schaum<sup>2</sup>,  
893 Jim Karkanas<sup>1</sup>, Norma F. Neff<sup>1</sup>, Spyros Darmanis<sup>1\*</sup>, Tony Wyss-Coray<sup>3-5\*</sup>, and Stephen  
894 R. Quake<sup>1,6\*</sup>

895

896 \* Correspondence to: [steve@quake-lab.org](mailto:steve@quake-lab.org), [twc@stanford.edu](mailto:twc@stanford.edu),  
897 [spyros.darmanis@czbiohub.org](mailto:spyros.darmanis@czbiohub.org)

898

899

900 **Organ collection and processing:** Jane Antony<sup>2</sup>, Ankit S. Baghel<sup>2</sup>, Isaac Bakerman<sup>2,7,8</sup>,  
901 Ishita Bansal<sup>3</sup>, Daniela Berdnik<sup>3</sup>, Biter Bilen<sup>3,4</sup>, Douglas Brownfield<sup>9</sup>, Corey Cain<sup>10</sup>,  
902 Michelle B. Chen<sup>4</sup>, Stephanie D. Conley<sup>2</sup>, Spyros Darmanis<sup>1</sup>, Aaron Demers<sup>2</sup>, Kubilay  
903 Demir<sup>2,11</sup>, Antoine de Morree<sup>3,4</sup>, Tessa Divita<sup>1</sup>, Haley du Bois<sup>5</sup>, Laughing Bear Torrez  
904 Dulgeroff<sup>2</sup>, Hamid Ebadi<sup>1</sup>, F. Hernán Espinoza<sup>9</sup>, Matt Fish<sup>2,11,12</sup>, Qiang Gan<sup>3,4</sup>, Benson M.  
905 George<sup>2</sup>, Astrid Gillich<sup>9</sup>, Foad Green<sup>1</sup>, Geraldine Genetiano<sup>1</sup>, Xueying Gu<sup>12</sup>, Gunsagar S.  
906 Gulati<sup>2</sup>, Yan Hang<sup>12</sup>, Shayan Hosseinzadeh<sup>1</sup>, Albin Huang<sup>4</sup>, Tal Iram<sup>4</sup>, Taichi Isobe<sup>1</sup>,  
907 Feather Ives<sup>2</sup>, Robert Jones<sup>3</sup>, Kevin S. Kao<sup>2</sup>, Guruswamy Karnam<sup>13</sup>, Aaron M. Kershner<sup>2</sup>,  
908 Nathalie Khoury<sup>3</sup>, Bernhard M. Kiss<sup>2,14</sup>, William Kong<sup>2</sup>, Maya E. Kumar<sup>15,16</sup>, Jonathan  
909 Lam<sup>12</sup>, Davis P. Lee<sup>6</sup>, Song E. Lee<sup>4</sup>, Olivia Leventhal<sup>5</sup>, Guang Li<sup>17</sup>, Qingyun Li<sup>18</sup>, Ling  
910 Liu<sup>3,4</sup>, Annie Lo<sup>1</sup>, Wan-Jin Lu<sup>1,9</sup>, Maria F. Lugo-Fagundo<sup>5</sup>, Anoop Manjunath<sup>1</sup>, Andrew  
911 P. May<sup>1</sup>, Ashley Maynard<sup>1</sup>, Marina McKay<sup>1</sup>, M. Windy McNerney<sup>32,33</sup>, Ross J.  
912 Metzger<sup>19,20</sup>, Marco Mignardi<sup>1</sup>, Dullei Min<sup>21</sup>, Ahmad N. Nabhan<sup>9</sup>, Norma F. Neff<sup>1</sup>,  
913 Katharine M. Ng<sup>3</sup>, Joseph Noh<sup>2</sup>, Rasika Patkar<sup>13</sup>, Weng Chuan Peng<sup>12</sup>, Lolita Penland<sup>1</sup>,  
914 Robert Puccinelli<sup>1</sup>, Eric J. Rulifson<sup>12</sup>, Nicholas Schaum<sup>2</sup>, Michael Seamus Haney<sup>3</sup>,  
915 Shaheen S. Sikandar<sup>2</sup>, Rahul Sinha<sup>2,22-24</sup>, Rene V. Sit<sup>1</sup>, Daniel Staehli<sup>3</sup>, Krzysztof  
916 Szade<sup>2,25</sup>, Weilun Tan<sup>1</sup>, Cristina Tato<sup>1</sup>, Krissie Tellez<sup>12</sup>, Kyle J. Travaglini<sup>9</sup>, Carolina  
917 Tropini<sup>26</sup>, Lucas Waldburger<sup>1</sup>, Linda J. van Weele<sup>2</sup>, Michael N. Wosczyzna<sup>3,4</sup>, Jinyi  
918 Xiang<sup>2</sup>, Soso Xue<sup>3</sup>, Andrew C. Yang<sup>3</sup>, Lakshmi P. Yerra<sup>5</sup>, Justin Youngyunpipatkul<sup>1</sup>,  
919 Fabio Zanini<sup>3</sup>, Macy E. Zardeneta<sup>6</sup>, Fan Zhang<sup>19</sup>, Hui Zhang<sup>5</sup>, Lu Zhou<sup>18</sup>

920

921 **Library preparation and sequencing:** Spyros Darmanis<sup>1</sup>, Shayan Hosseinzadeh<sup>1</sup>,  
922 Ashley Maynard<sup>1</sup>, Norma F. Neff<sup>1</sup>, Lolita Penland<sup>1</sup>, Rene V. Sit<sup>1</sup>, Michelle Tan<sup>1</sup>, Weilun  
923 Tan<sup>1</sup>, Alexander Zee<sup>1</sup>

924

925 **Computational Data Analysis:** Oliver Hahn<sup>3</sup>, Lincoln Harris<sup>1</sup>, Andreas Keller<sup>3,36</sup>,  
926 Benoit Lehallier<sup>3</sup>, Aaron McGeever<sup>1</sup>, Angela Oliveira Pisco<sup>1</sup>, Róbert Pálovics<sup>3</sup>, Weilun  
927 Tan<sup>1</sup>, Martin Zhang<sup>30,37</sup>

928

929 **Cell Type Annotation:** Nicole Almanzar<sup>21</sup>, Jane Antony<sup>2</sup>, Biter Bilen<sup>3,4</sup>, Weng Chuan  
930 Peng<sup>12</sup>, Spyros Darmanis<sup>1</sup>, Antoine de Morree<sup>3,4</sup>, Oliver Hahn<sup>3</sup>, Yan Hang<sup>12</sup>, Mu He<sup>31</sup>,  
931 Shayan Hosseinzadeh<sup>1</sup>, Tal Iram<sup>4</sup>, Taichi Isobe<sup>1</sup>, Aaron M. Kershner<sup>1</sup>, Jonathan Lam<sup>12</sup>,  
932 Guang Li<sup>17</sup>, Qingyun Li<sup>18</sup>, Ling Liu<sup>3,4</sup>, Wan-Jin Lu<sup>1,9</sup>, Ashley Maynard<sup>1</sup>, Dullei Min<sup>21</sup>,  
933 Ahmad N. Nabhan<sup>9</sup>, Patricia K. Nguyen<sup>2,7,8,17</sup>, Angela Oliveira Pisco<sup>1</sup>, Zhen Qi<sup>2</sup>,  
934 Nicholas Schaum<sup>2</sup>, Joe M. Segal<sup>13</sup>, Shaheen S. Sikandar<sup>2</sup>, Rahul Sinha<sup>1,22-24</sup>, Rene Sit<sup>1</sup>,  
935 Michelle Tan<sup>1</sup>, Weilun Tan<sup>1</sup>, Kyle J. Travaglini<sup>9</sup>, Margaret Tsui<sup>13</sup>, Bruce M. Wang<sup>13</sup>,  
936 Linda J. van Weele<sup>2</sup>, Michael N. Wosczyzna<sup>3,4</sup>, Jinyi Xiang<sup>2</sup>, Alexander Zee<sup>1</sup>, Lu Zhou<sup>18</sup>

937

938 **Liver staining and data analysis:** Rafael Gómez-Sjöberg<sup>1</sup>, Angela Oliveira Pisco<sup>1</sup>, Joe  
939 M. Segal<sup>13</sup>, Margaret Tsui<sup>13</sup>, Kevin A Yamauchi<sup>1</sup>

940

941 **Microbiome analysis:** Bryan Merrill<sup>26</sup>, Aaron McGeever<sup>1</sup>, Katharine M. Ng<sup>3</sup>, Angela  
942 Oliveira Pisco<sup>1</sup>, Carolina Tropini<sup>26</sup>, Brian Yu<sup>1</sup>, Chunyu Zhao<sup>1</sup>, Katherine Pollard<sup>34</sup>, Justin  
943 Sonnenburg<sup>26</sup>, Kerwyn Casey Huang<sup>2,3</sup>

944

945 **Writing Group:** Spyros Darmanis<sup>1</sup>, Angela Oliveira Pisco<sup>1</sup>, Stephen R. Quake<sup>1,6</sup>, Tony  
946 Wyss-Coray<sup>3-5</sup>

947

948 **Principal Investigators:** Ben A. Barres<sup>18</sup>, Philip A. Beachy<sup>2,9,11,12</sup>, Charles K. F. Chan<sup>28</sup>,  
949 Michael F. Clarke<sup>2</sup>, Spyros Darmanis<sup>1</sup>, Kerwyn Casey Huang<sup>2,3,26</sup>, Jim Karkanas<sup>1</sup>, Seung  
950 K. Kim<sup>12,29</sup>, Mark A. Krasnow<sup>9,11</sup>, Maya E. Kumar<sup>15,16</sup>, Christin S. Kuo<sup>9,11,21</sup>, Ross J.  
951 Metzger<sup>19,20</sup>, Norma F. Neff<sup>2</sup>, Roel Nusse<sup>9,11,12</sup>, Patricia K. Nguyen<sup>2,7,8,17</sup>, Thomas A.  
952 Rando<sup>3-5</sup>, Justin Sonnenburg<sup>26</sup>, Bruce M. Wang<sup>13</sup>, Kenneth Weinberg<sup>21</sup>, Irving L.  
953 Weissman<sup>2,22-24</sup>, Sean M. Wu<sup>2,7,17</sup>, James Zou<sup>1,30,35</sup>, Stephen R. Quake<sup>2,6</sup>, Tony Wyss-  
954 Coray<sup>3-5</sup>

955

956 <sup>1</sup> Chan Zuckerberg Biohub, San Francisco, California, USA

957 <sup>2</sup> Institute for Stem Cell Biology and Regenerative Medicine, Stanford University School  
958 of Medicine, Stanford, California, USA

959 <sup>3</sup> Department of Neurology and Neurological Sciences, Stanford University School of  
960 Medicine, Stanford, California, USA

961 <sup>4</sup> Paul F. Glenn Center for the Biology of Aging, Stanford University School of  
962 Medicine, Stanford, California, USA

963 <sup>5</sup> Center for Tissue Regeneration, Repair, and Restoration, V.A. Palo Alto Healthcare  
964 System, Palo Alto, California, USA

965 <sup>6</sup> Department of Bioengineering, Stanford University, Stanford, California, USA

966 <sup>7</sup> Stanford Cardiovascular Institute, Stanford University School of Medicine, Stanford,  
967 California, USA

968 <sup>8</sup> Department of Medicine, Division of Cardiology, Stanford University School of  
969 Medicine, Stanford, California, USA

970 <sup>9</sup> Department of Biochemistry, Stanford University School of Medicine, Stanford,  
971 California, USA  
972 <sup>10</sup> Flow Cytometry Core, V.A. Palo Alto Healthcare System, Palo Alto, California, USA  
973 <sup>11</sup> Howard Hughes Medical Institute, USA  
974 <sup>12</sup> Department of Developmental Biology, Stanford University School of Medicine,  
975 Stanford, California, USA  
976 <sup>13</sup> Department of Medicine and Liver Center, University of California San Francisco, San  
977 Francisco, California, USA  
978 <sup>14</sup> Department of Urology, Stanford University School of Medicine, Stanford, California,  
979 USA  
980 <sup>15</sup> Sean N. Parker Center for Asthma and Allergy Research, Stanford University School  
981 of Medicine, Stanford, California, USA  
982 <sup>16</sup> Department of Medicine, Division of Pulmonary and Critical Care, Stanford University  
983 School of Medicine, Stanford, California, USA  
984 <sup>17</sup> Department of Medicine, Division of Cardiovascular Medicine, Stanford University,  
985 Stanford, California, USA  
986 <sup>18</sup> Department of Neurobiology, Stanford University School of Medicine, Stanford, CA  
987 USA  
988 <sup>19</sup> Vera Moulton Wall Center for Pulmonary and Vascular Disease, Stanford University  
989 School of Medicine, Stanford, California, USA  
990 <sup>20</sup> Department of Pediatrics, Division of Cardiology, Stanford University School of  
991 Medicine, Stanford, California, USA  
992 <sup>21</sup> Department of Pediatrics, Stanford University school of Medicine, Stanford,  
993 California, USA  
994 <sup>22</sup> Department of Pathology, Stanford University School of Medicine, Stanford,  
995 California, USA  
996 <sup>23</sup> Ludwig Center for Cancer Stem Cell Research and Medicine, Stanford University  
997 School of Medicine, Stanford, California, USA  
998 <sup>24</sup> Stanford Cancer Institute, Stanford University School of Medicine, Stanford,  
999 California, USA  
1000 <sup>25</sup> Department of Medical Biotechnology, Faculty of Biophysics, Biochemistry and  
1001 Biotechnology, Jagiellonian University, Poland  
1002 <sup>26</sup> Department of Microbiology & Immunology, Stanford University School of Medicine,  
1003 Stanford, California, USA  
1004 <sup>27</sup> Department of Biochemistry and Biophysics, University of California San Francisco,  
1005 San Francisco, California USA  
1006 <sup>28</sup> Department of Surgery, Division of Plastic and Reconstructive Surgery, Stanford  
1007 University, Stanford, California USA  
1008 <sup>29</sup> Department of Medicine and Stanford Diabetes Research Center, Stanford University,  
1009 Stanford, California USA  
1010 <sup>30</sup> Department of Electrical Engineering, Stanford University, Palo Alto, 94304 USA  
1011 <sup>31</sup> Department of Physiology, University of California, San Francisco, CA 94158  
1012 <sup>32</sup> Mental Illness Research Education and Clinical Center, V.A. Palo Alto Healthcare  
1013 System, Palo Alto, California, USA  
1014 <sup>33</sup> Department of Psychiatry, Stanford University School of Medicine, Stanford,  
1015 California, USA



1016 <sup>34</sup> Department of Epidemiology and Biostatistics, University of California, San Francisco,  
1017 CA 94158

1018 <sup>35</sup> Department of Biomedical Data Science, Stanford University, Palo Alto, 94304 USA

1019 <sup>36</sup> Clinical Bioinformatics, Saarland University, Saarbrücken, Germany

1020 <sup>37</sup> Department of Epidemiology, Harvard T.H. Chan School of Public Health,  
1021 Boston, Massachusetts, USA

1022

1023

1024

1025

1026

1027

1028

1029

1030

1031

1032

1033

1034

1035

1036

1037

1038

1039

1040

1041

1042

1043

1044

1045

1046

1047

# Tabula Muris Senis Fig. 1

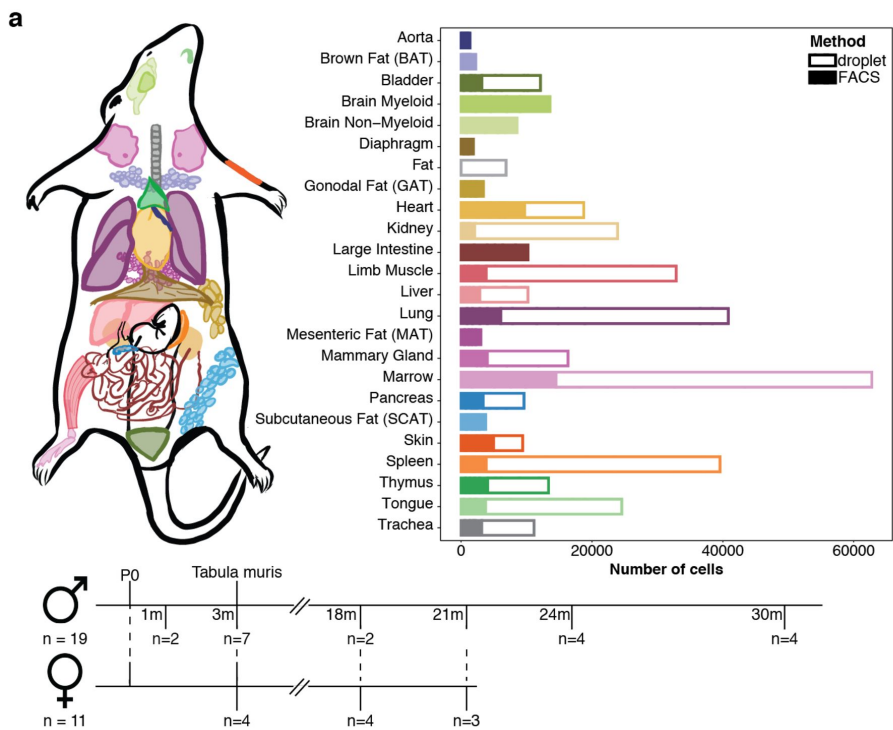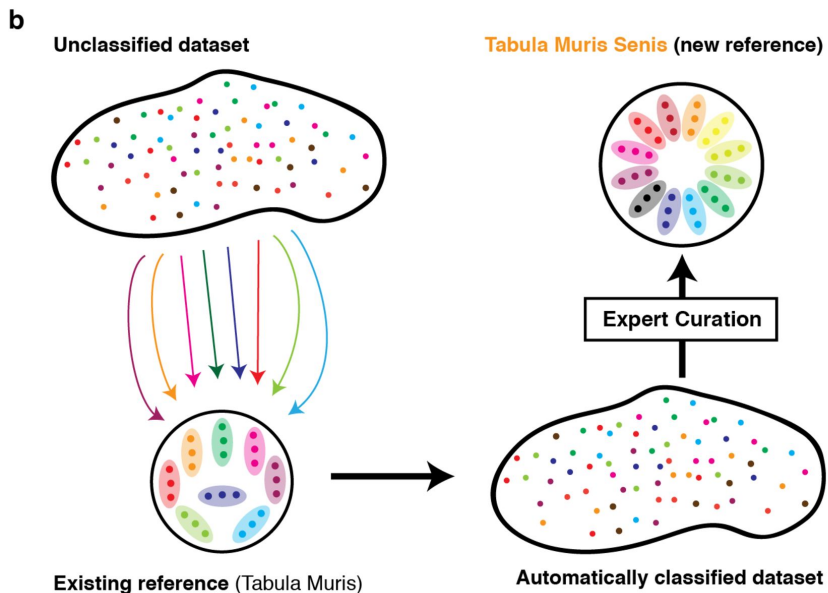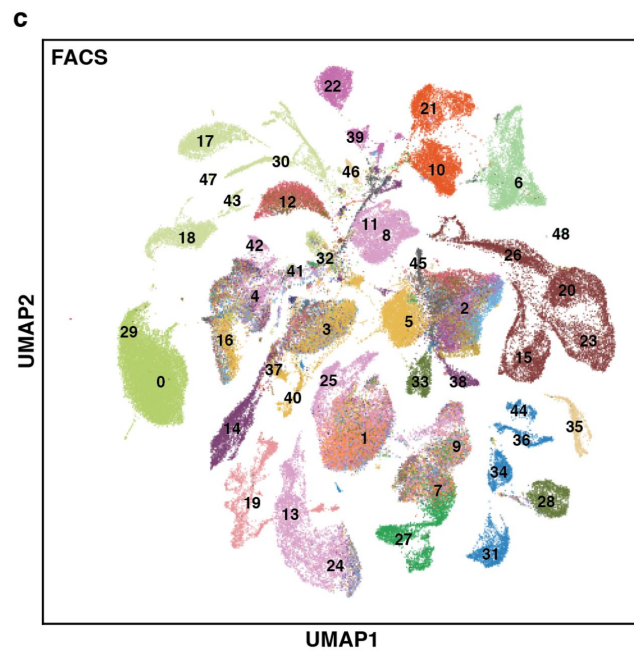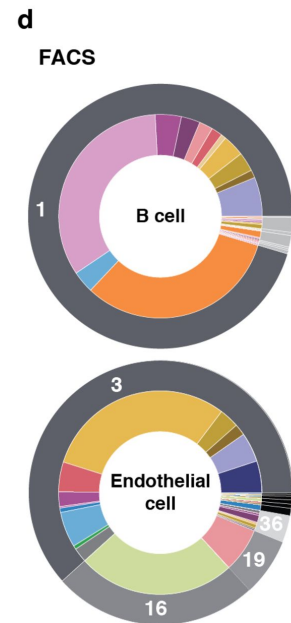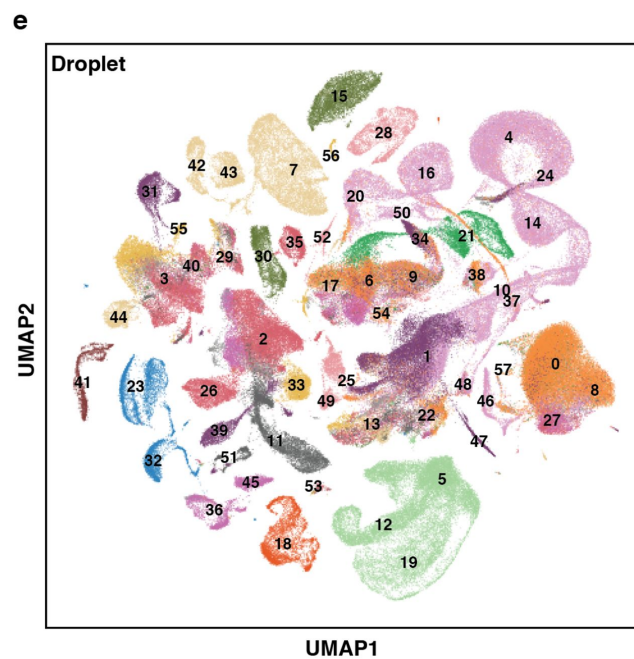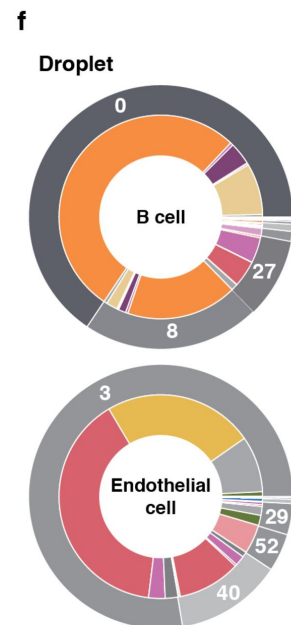

# Tabula Muris Senis Fig.2

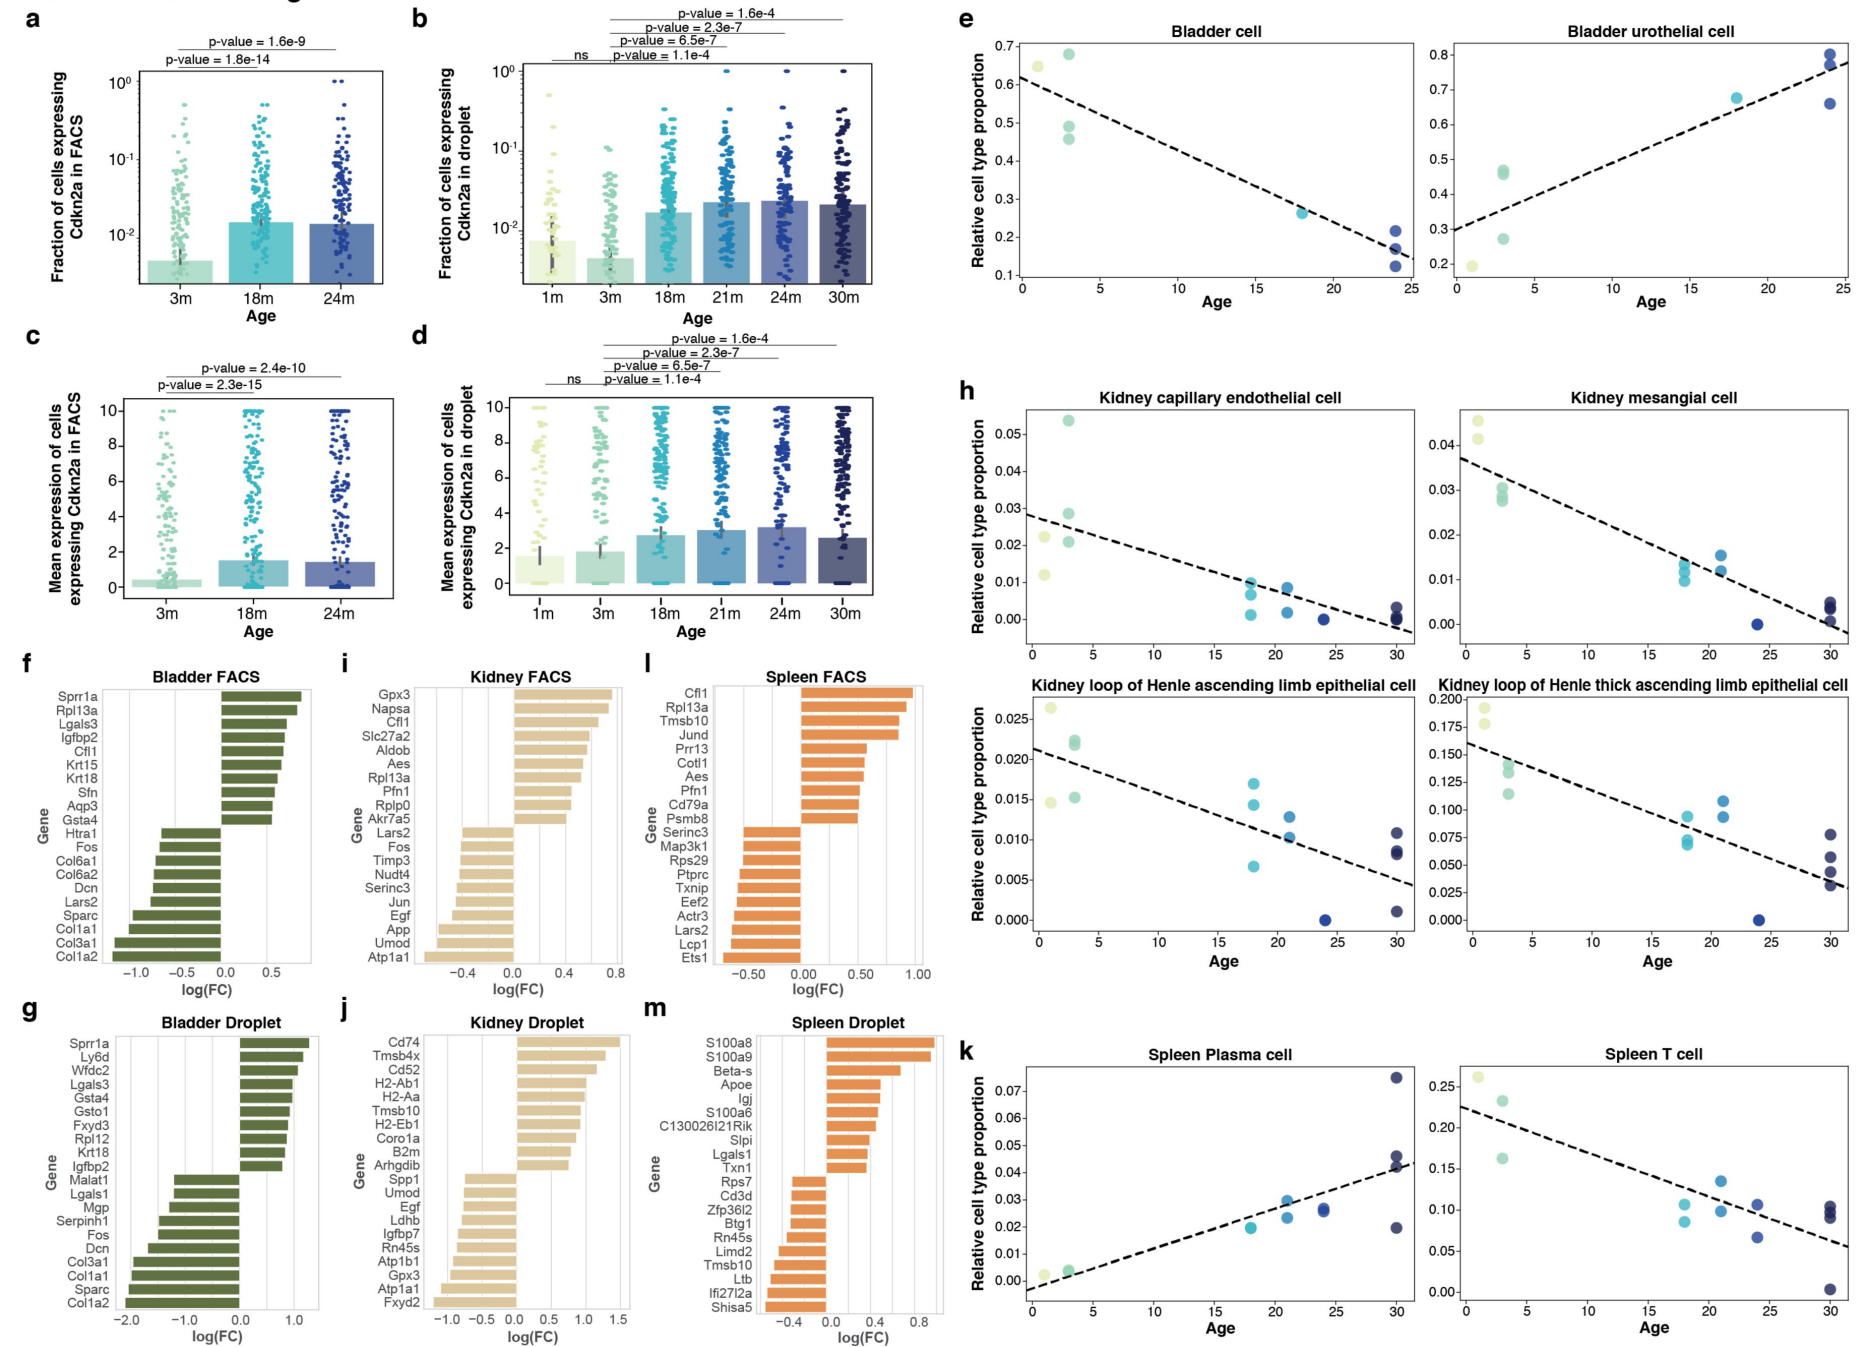

**Tabula Muris Senis Fig.3**

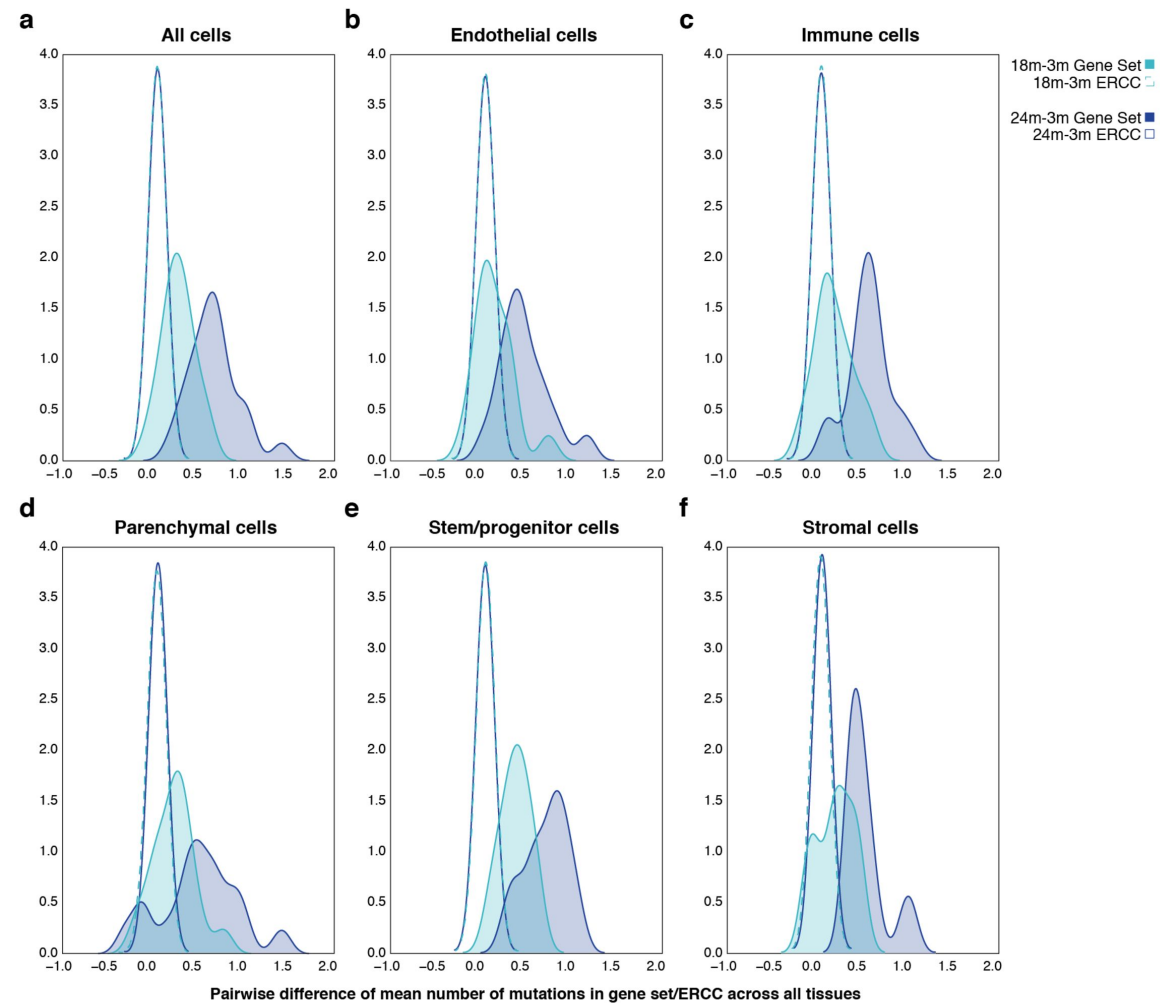

# Tabula Muris Senis Fig.4

**a**

6050 cells with assembled BCR

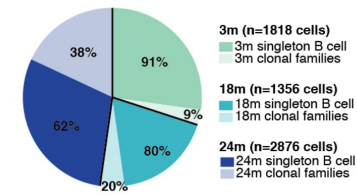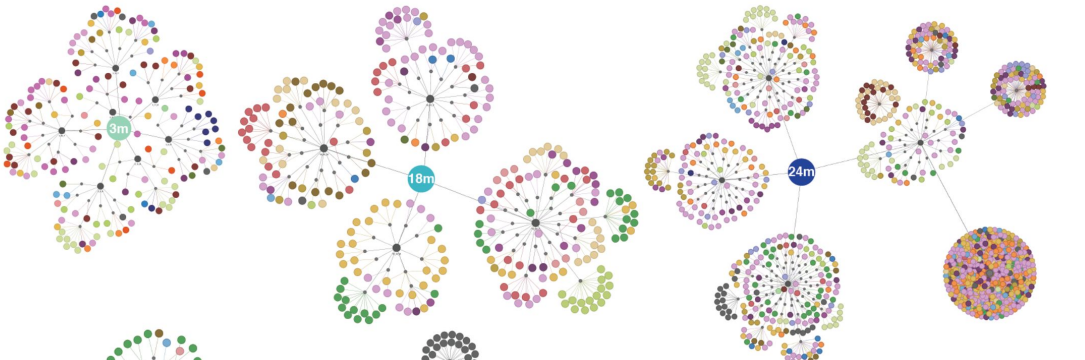

**b**

6000 cells with assembled TCR

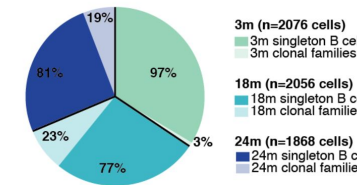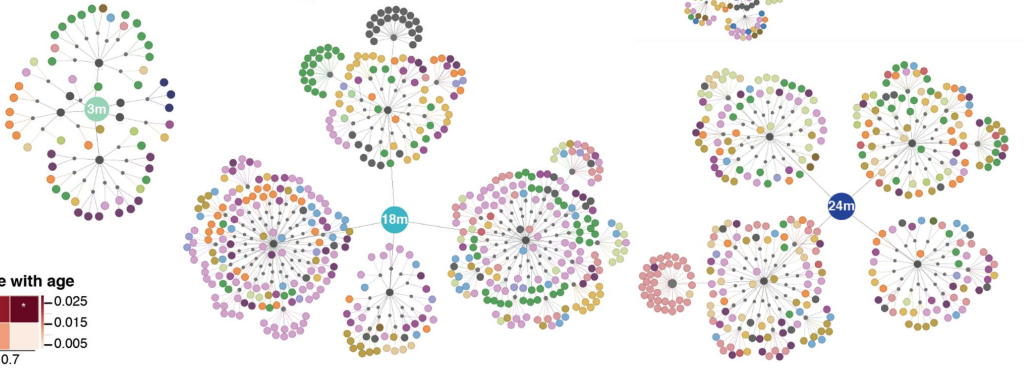

**c**

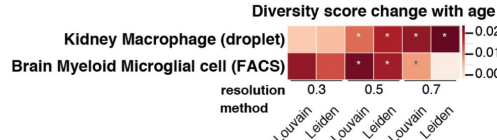

**d**

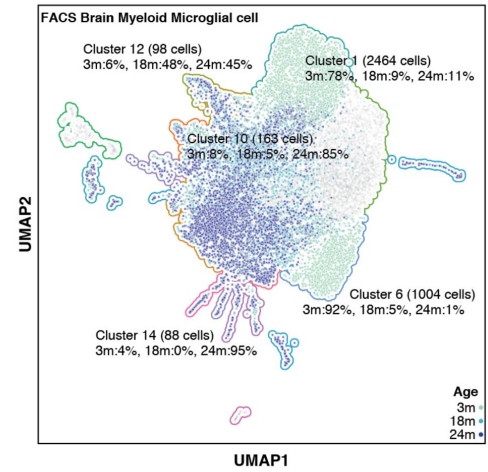

**e**

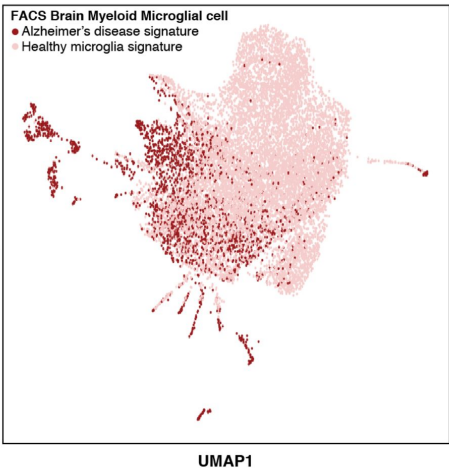

**f**

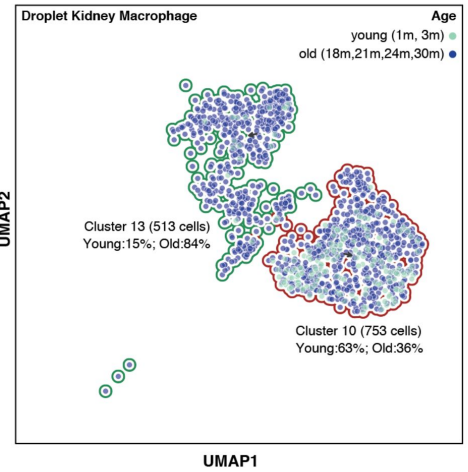

Tabula Muris Senis Extended Data Fig. 1

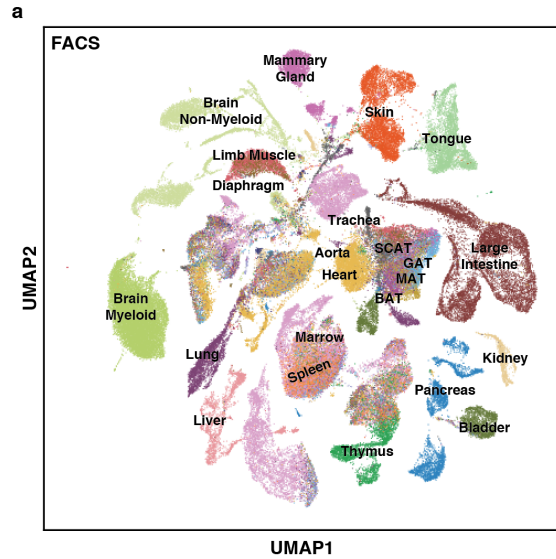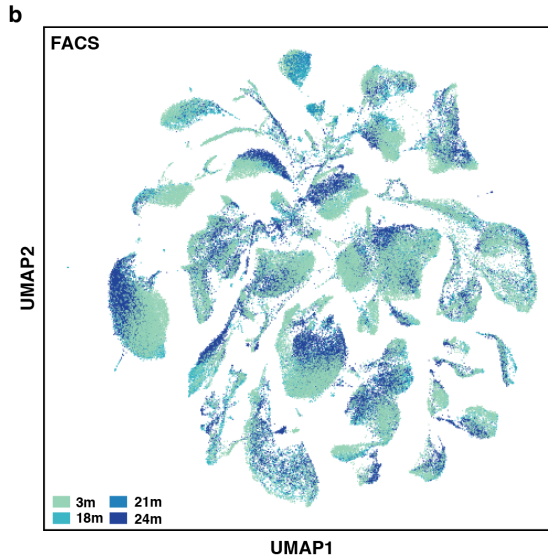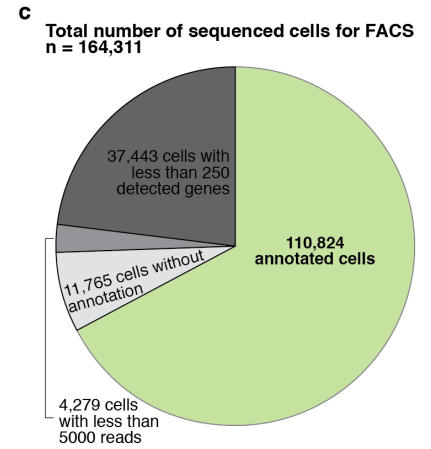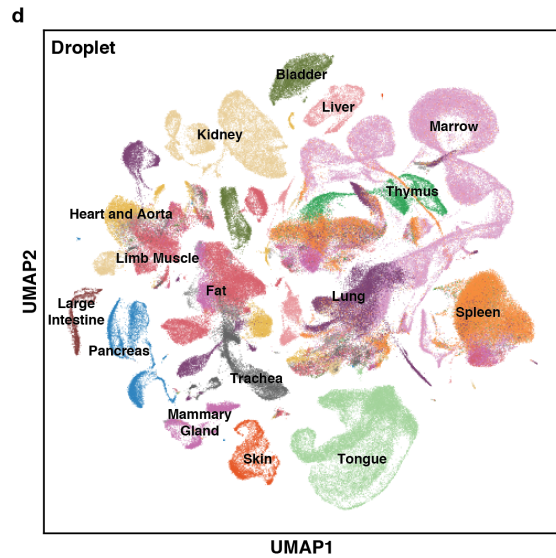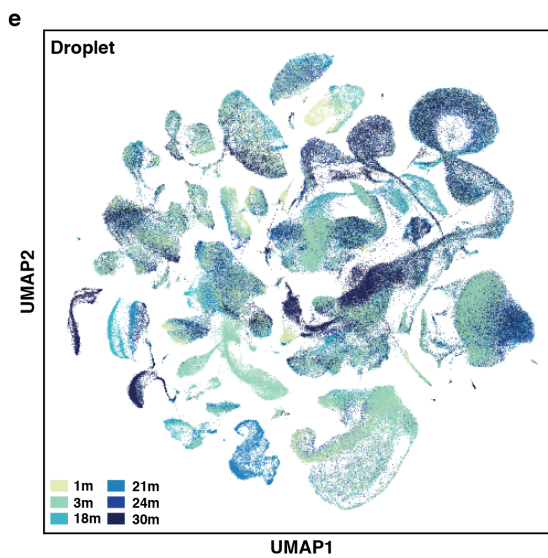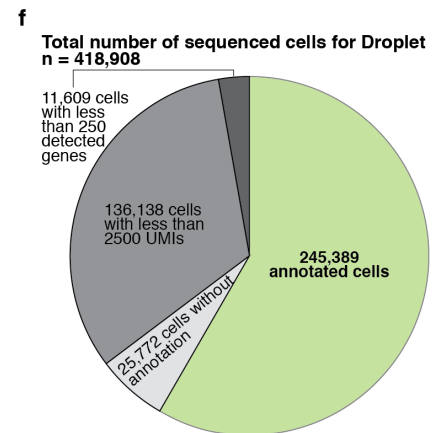

**Tabula Muris Senis Extended Data Fig. 2**

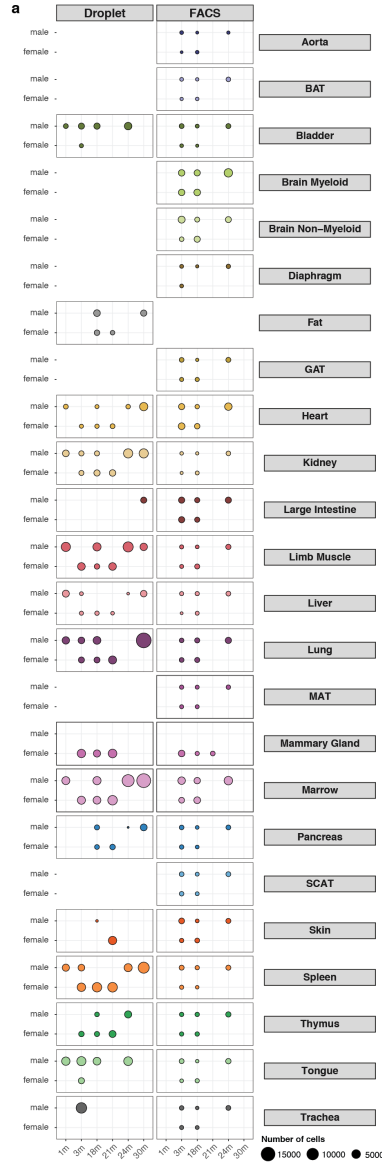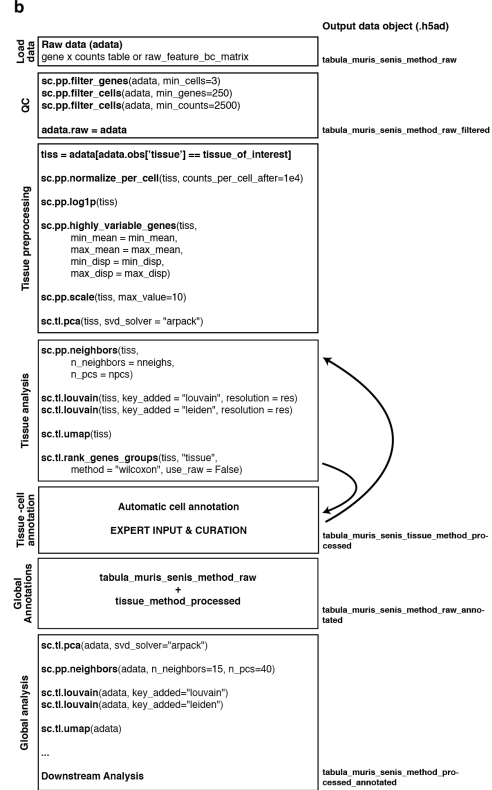

**c Tabula Muris Senis Tissue Color Dictionary**

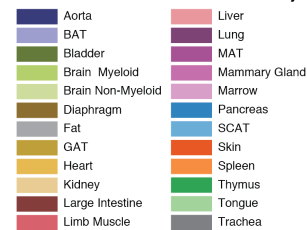

**d Tabula Muris Senis Age Color Dictionary**

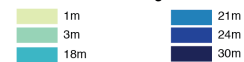

### Tabula Muris Senis Extended Data Fig. 3

**a**

**FACS**

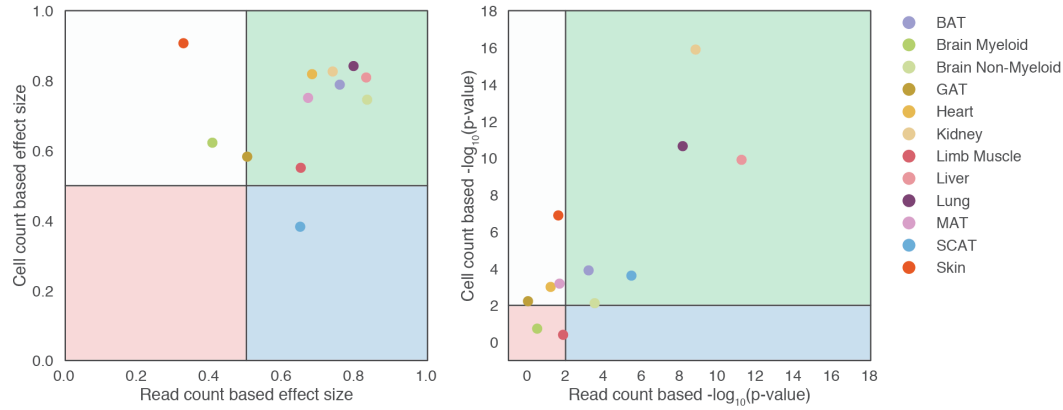

**b**

**Droplet**

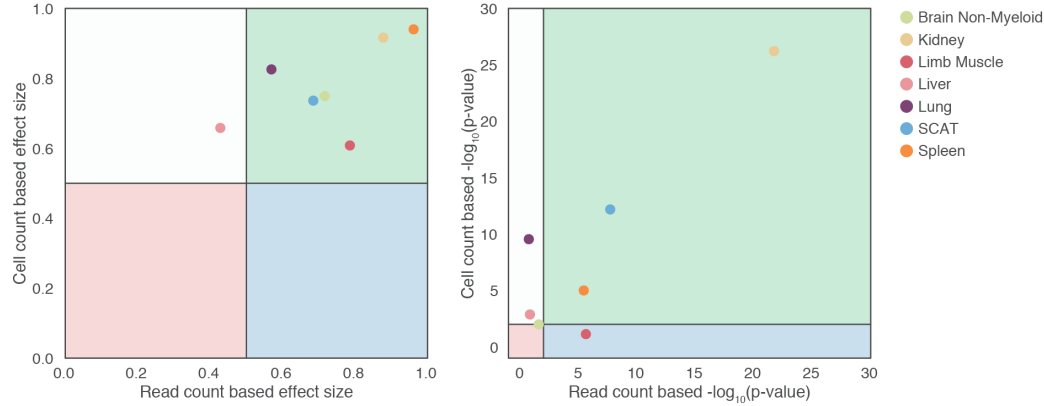

bulk signal explained neither by single-cell read nor by cell count
  bulk signal explained by read count only
  bulk signal explained by cell count only
  bulk signal explained by both single-cell read and cell count



Tabula Muris Senis Extended Data Fig. 4

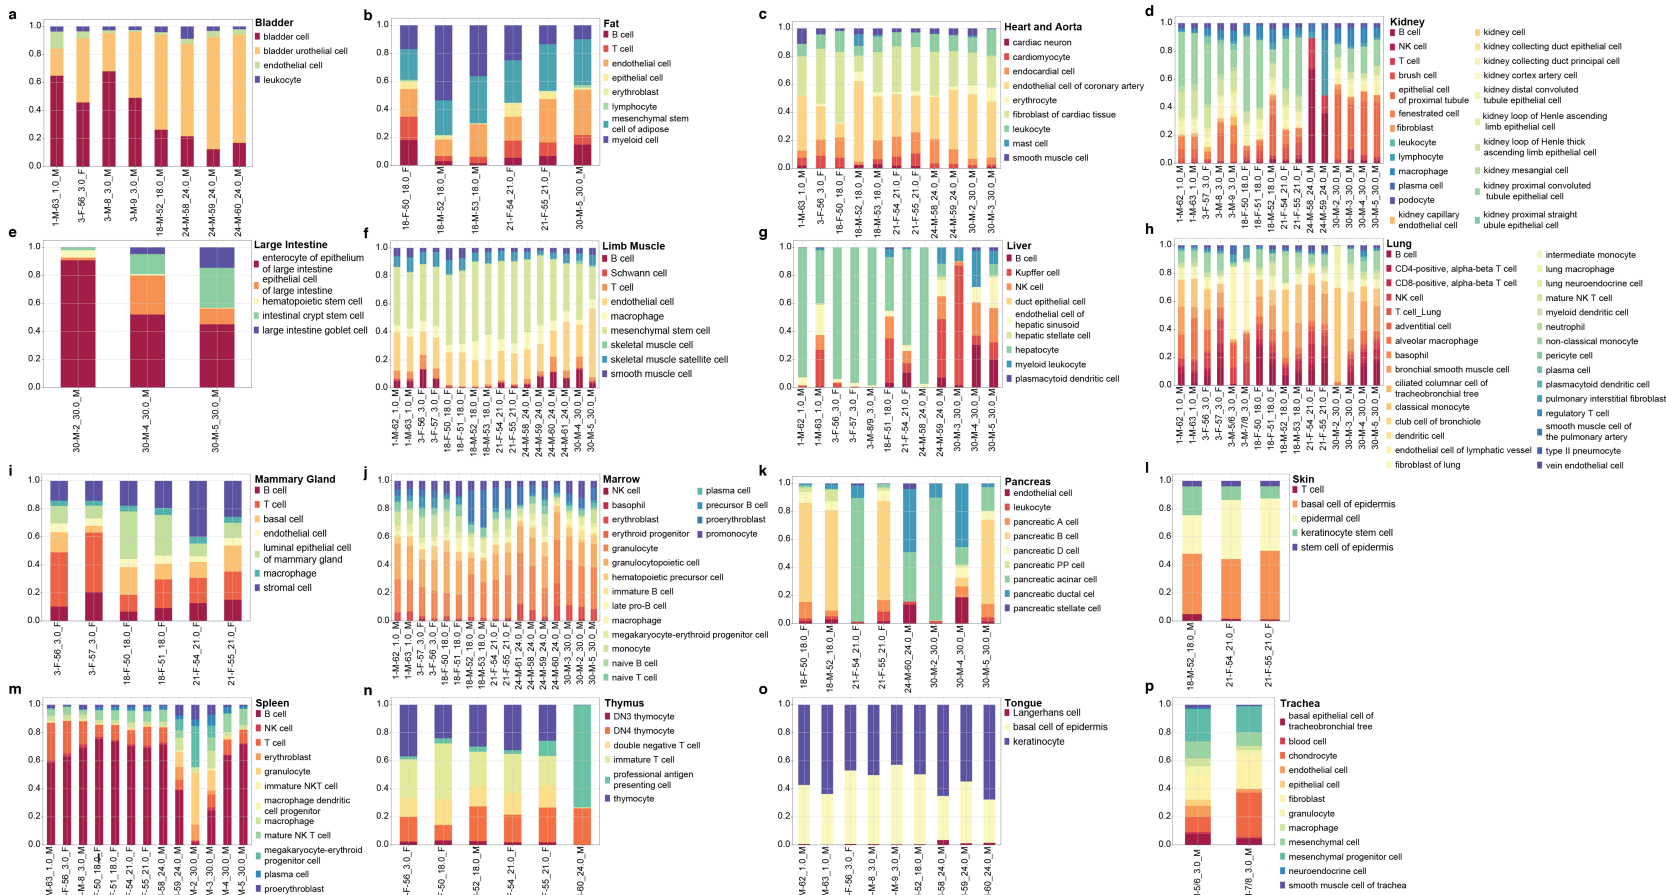

Tabula Muris Senis Extended Data Fig. 5

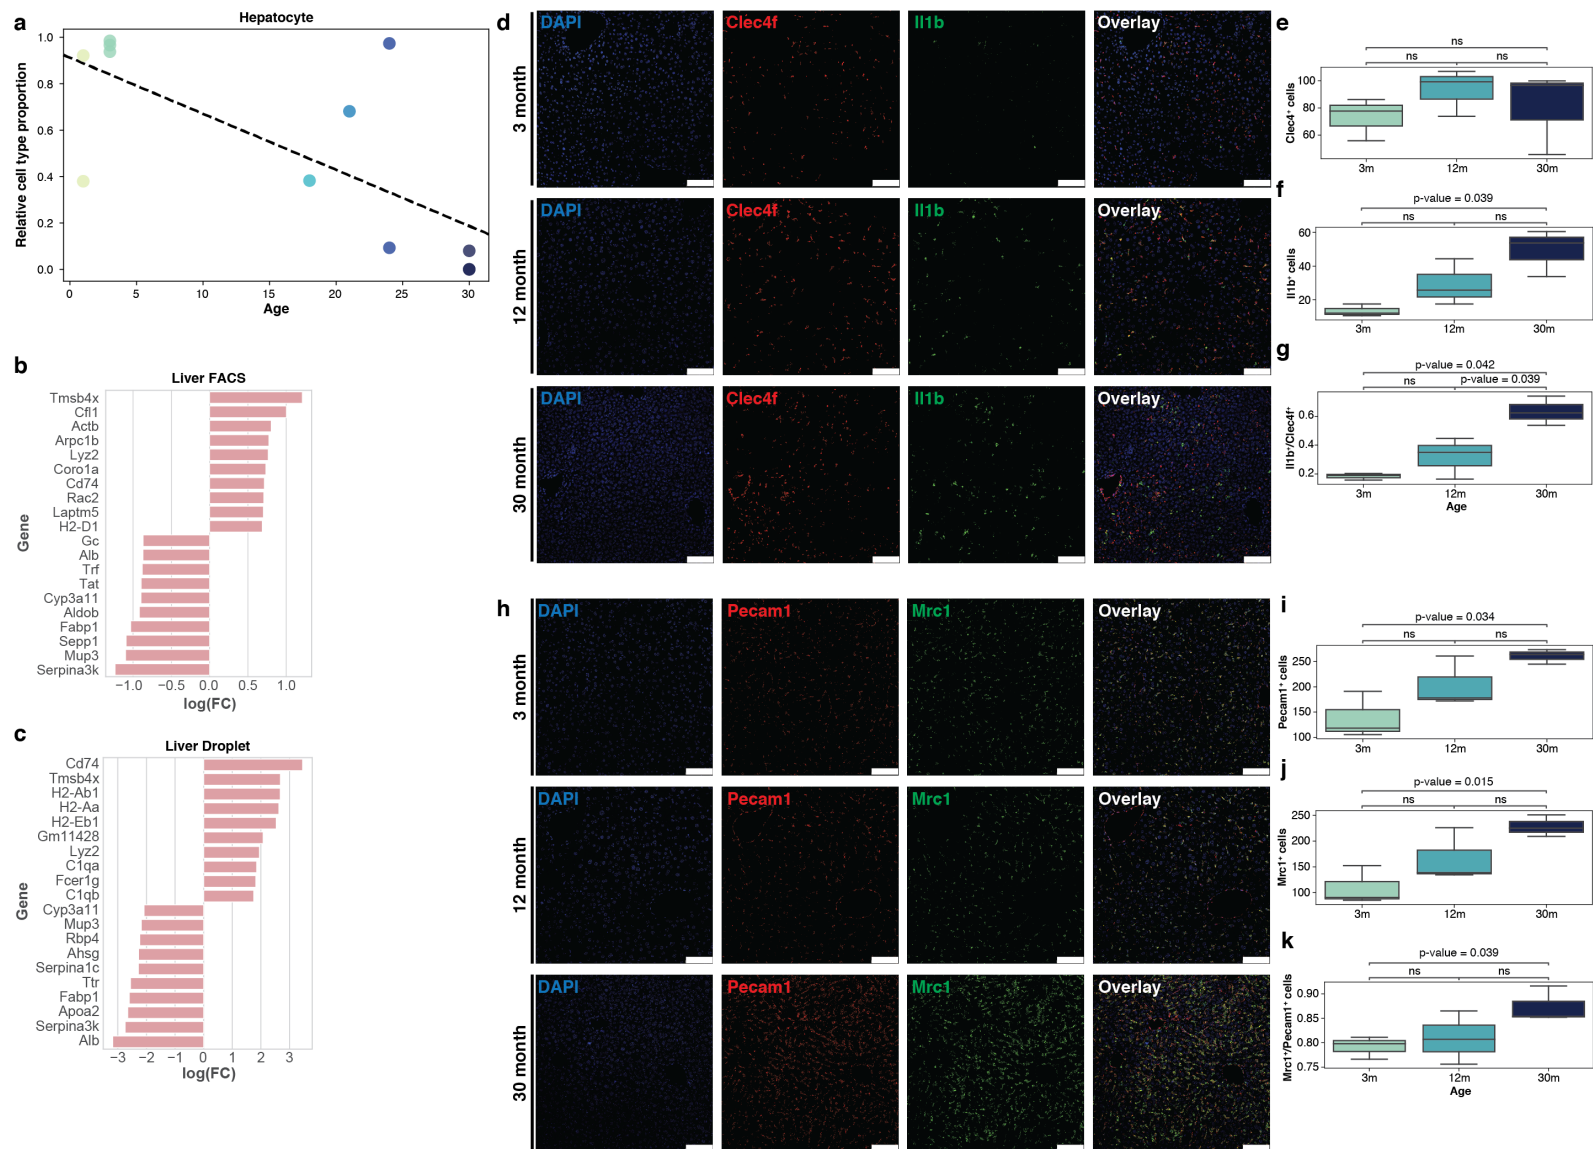

# Tabula Muris Senis Extended Data Fig. 6

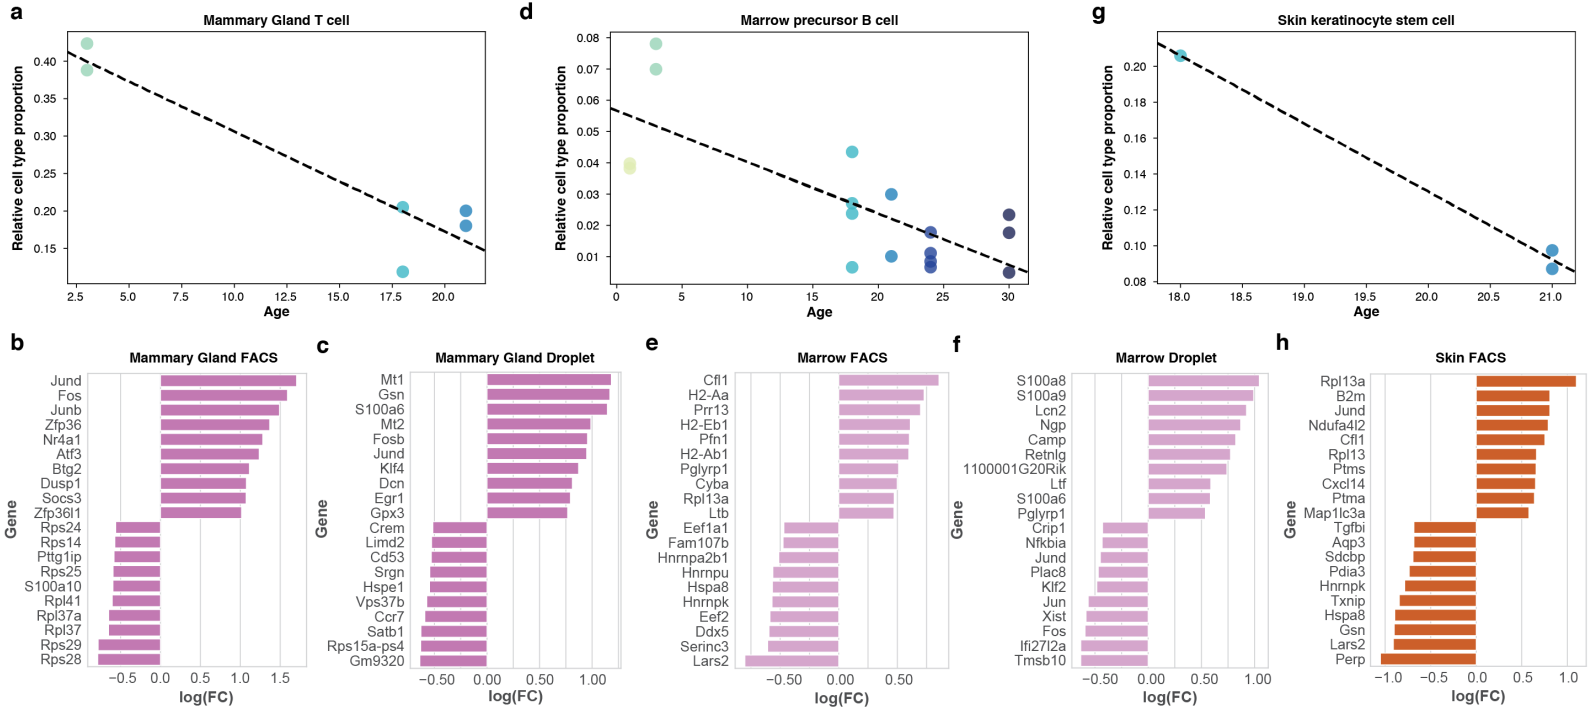

Tabula Muris Senis Extended Data Fig.7

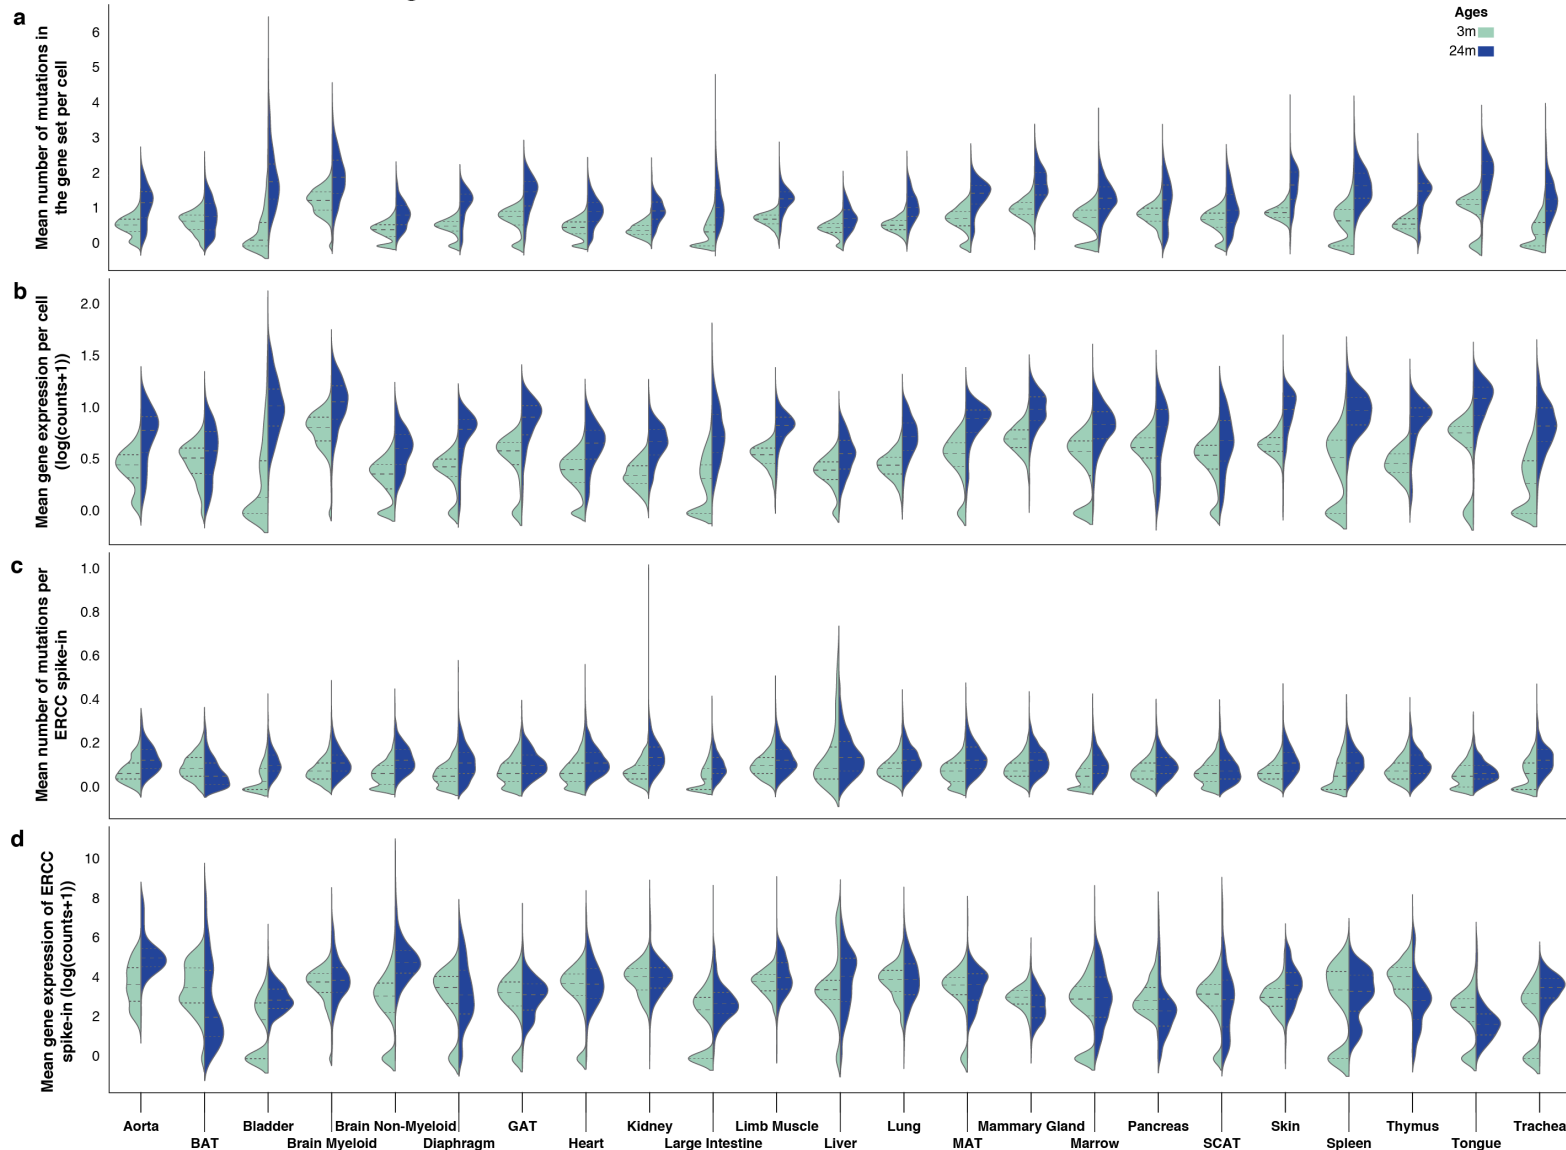

**Tabula Muris Senis Extended Data Fig.8**

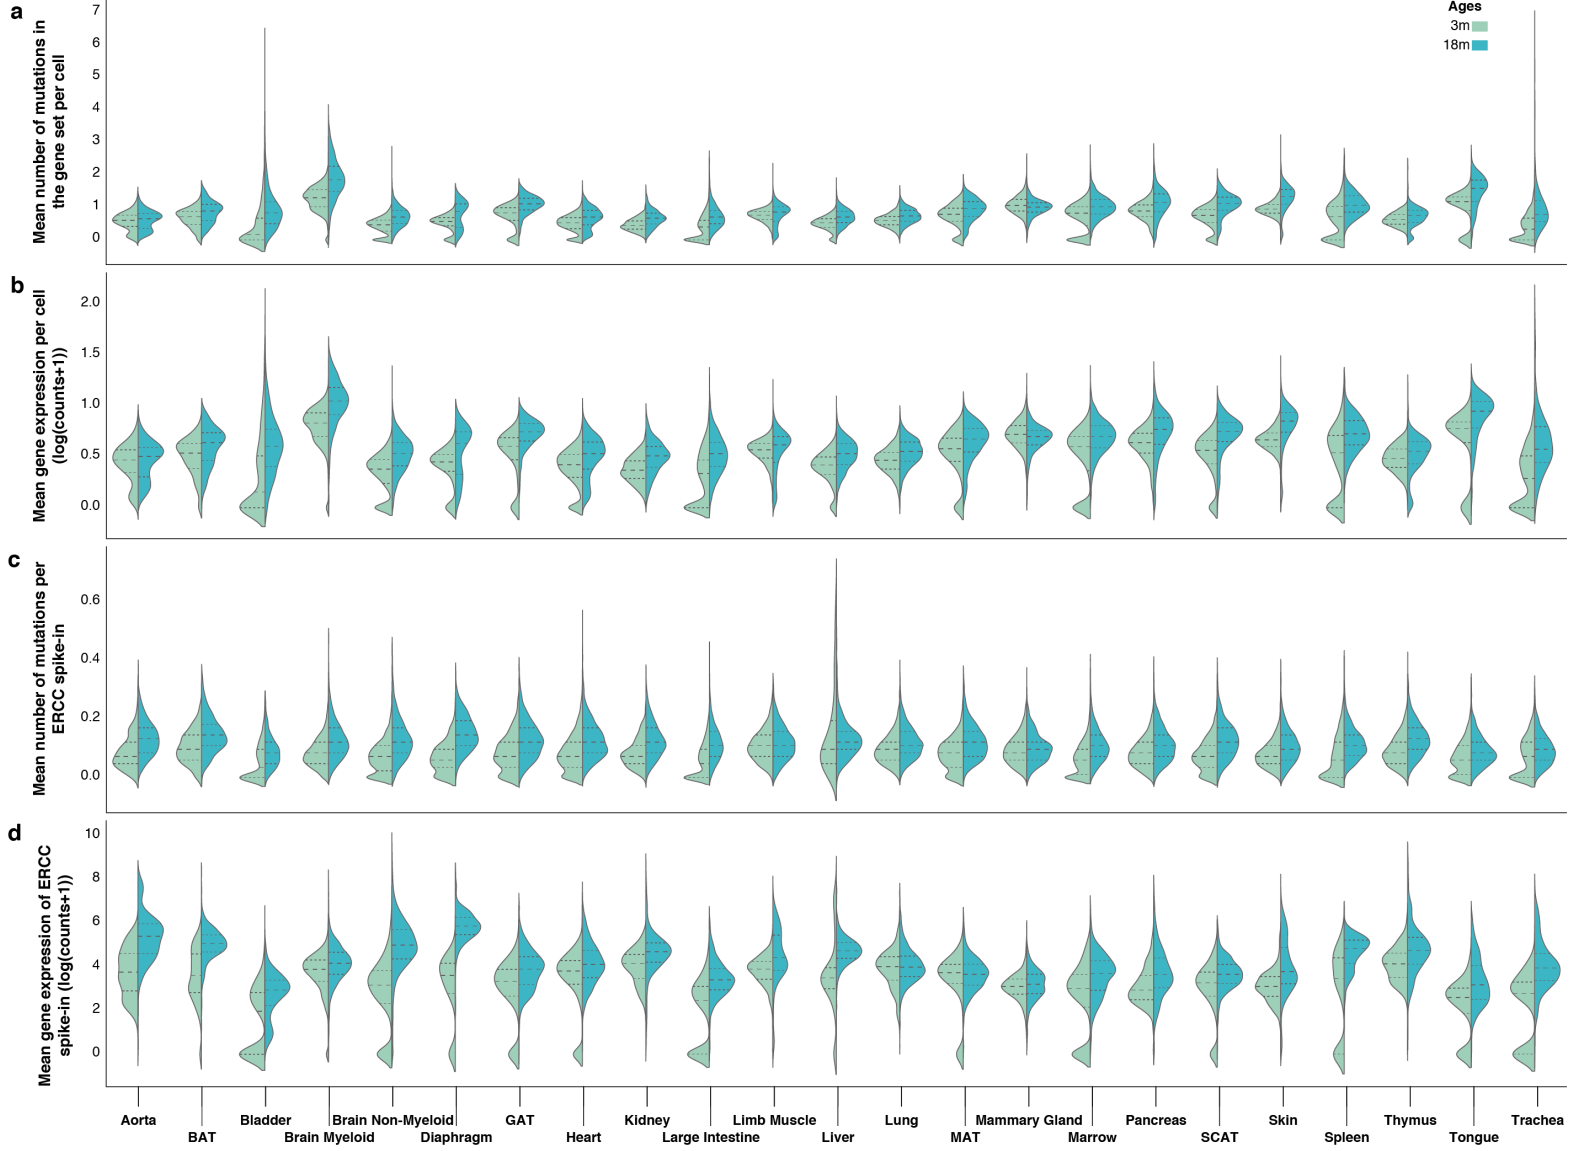

Tabula Muris Senis Extended Data Fig.9

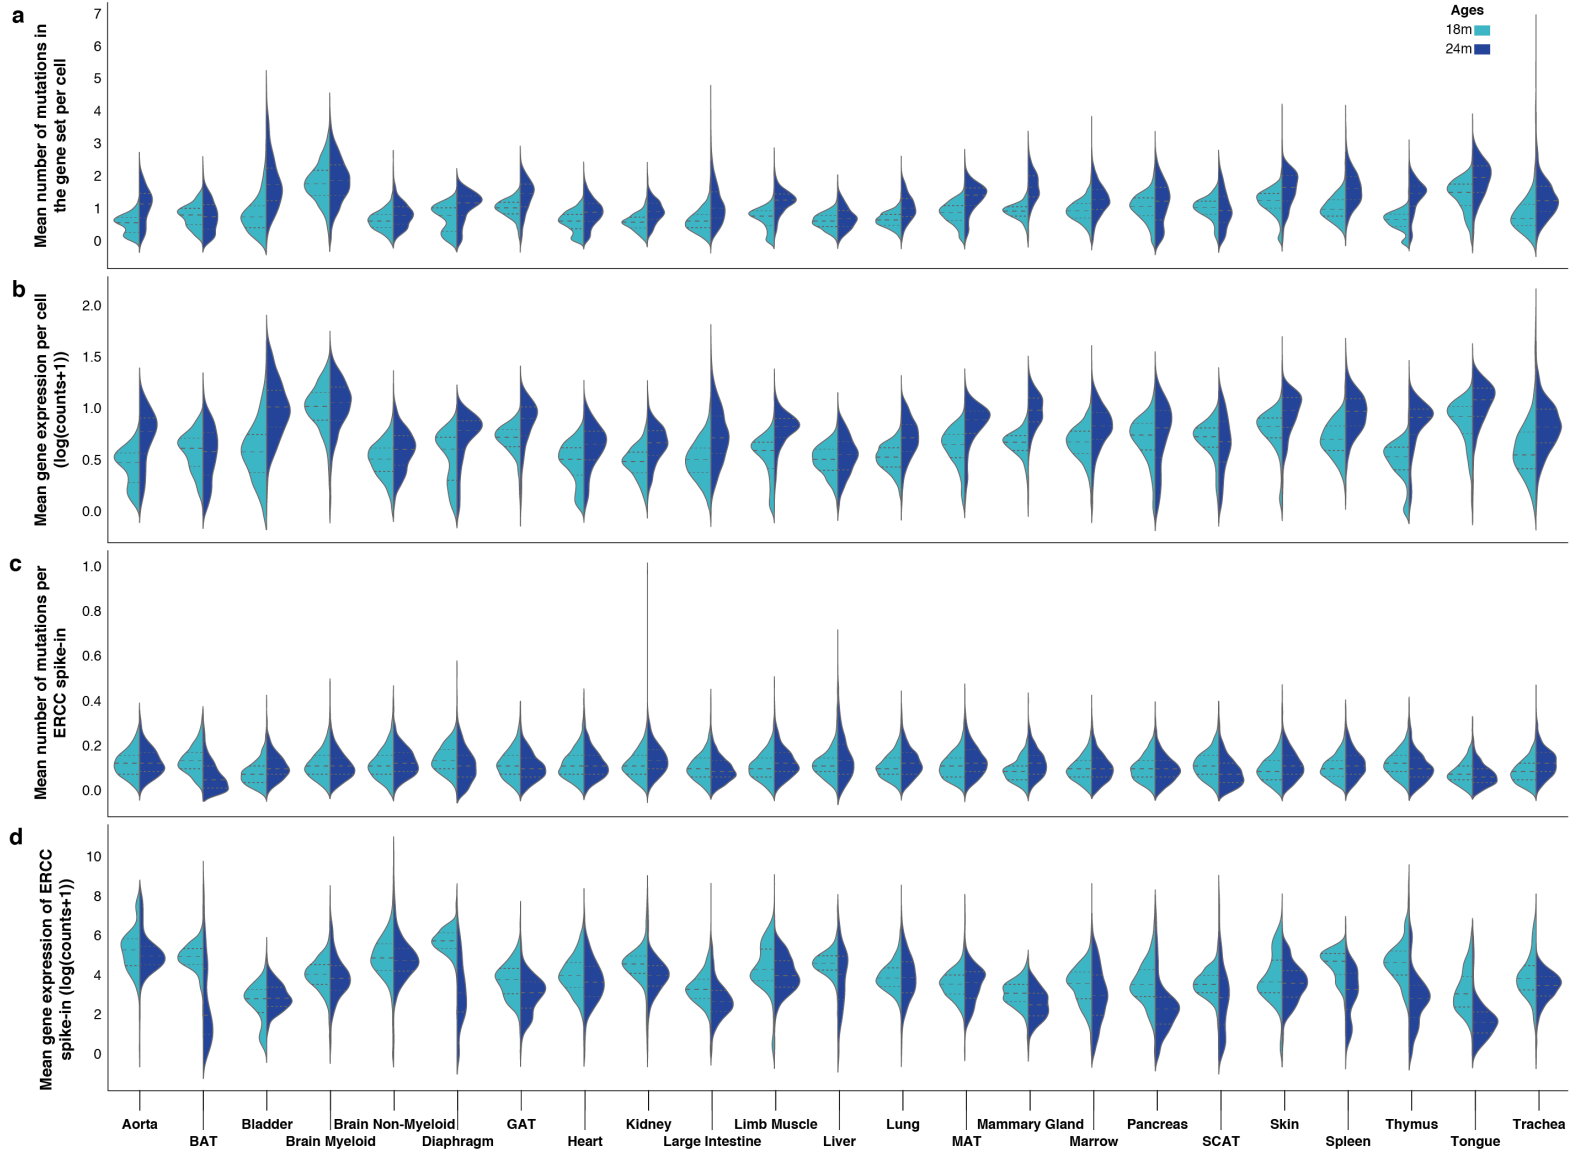

# Tabula Muris Senis Extended Data Figure 10

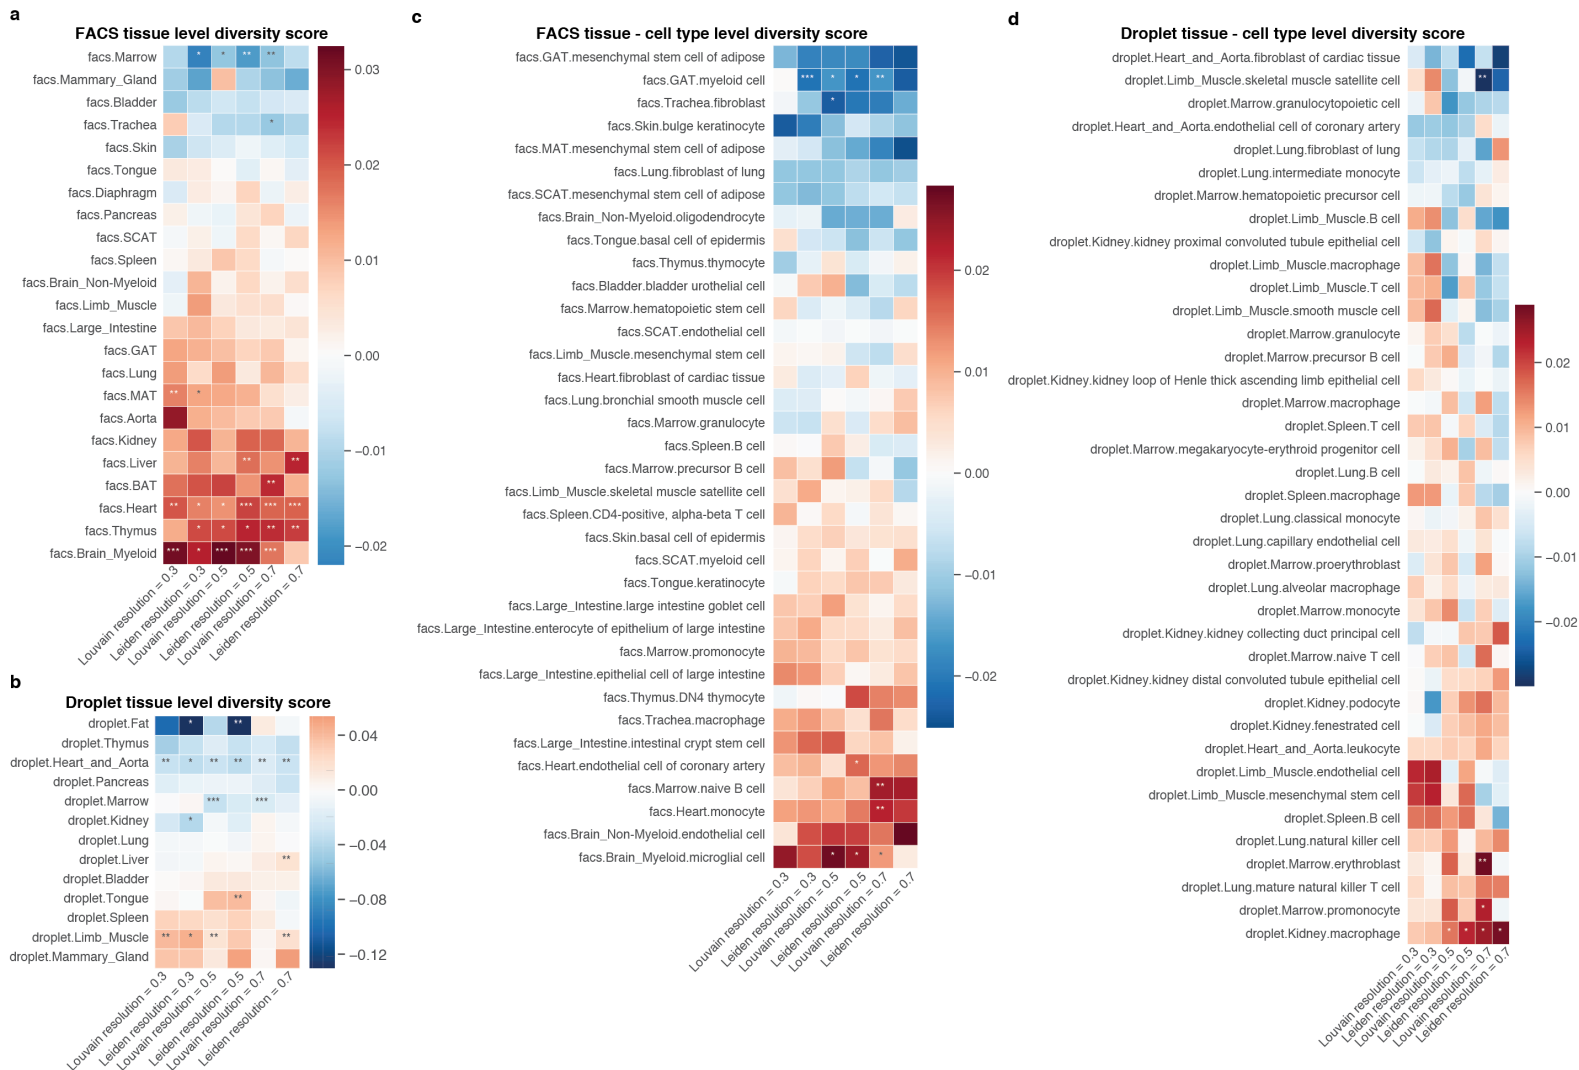

# Tabula Muris Senis Extended Data Figure 11

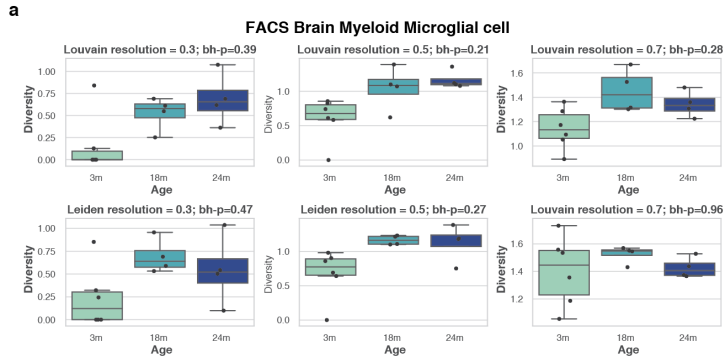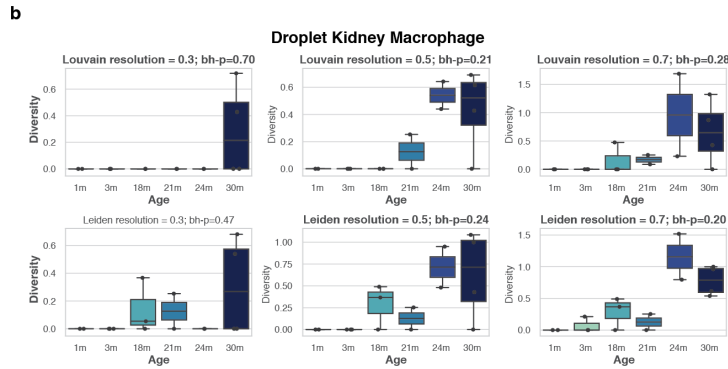

**e** **FACS Brain Myeloid Microglia trajectory inference**

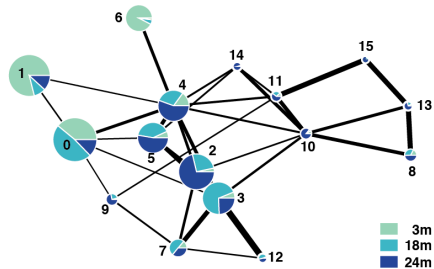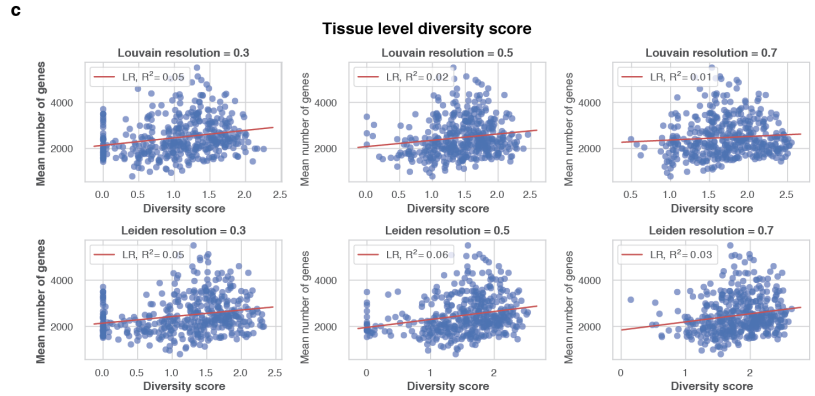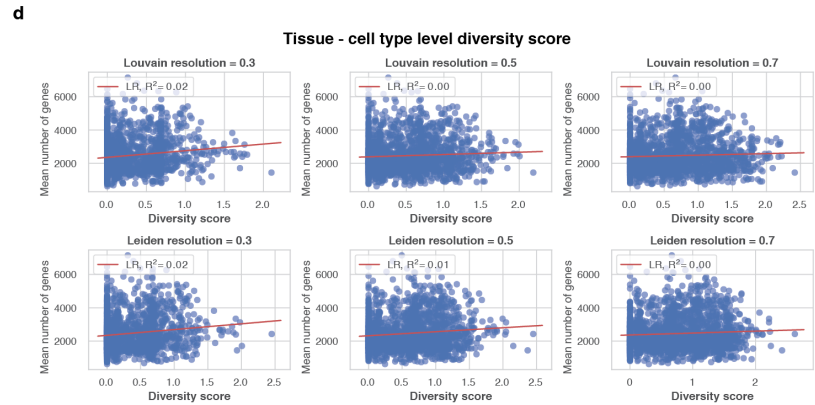

**f** **Droplet Kidney Macrophage**

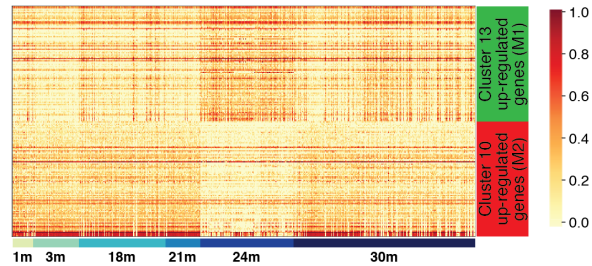



# Tabula Muris Senis Supplementary Fig. 1

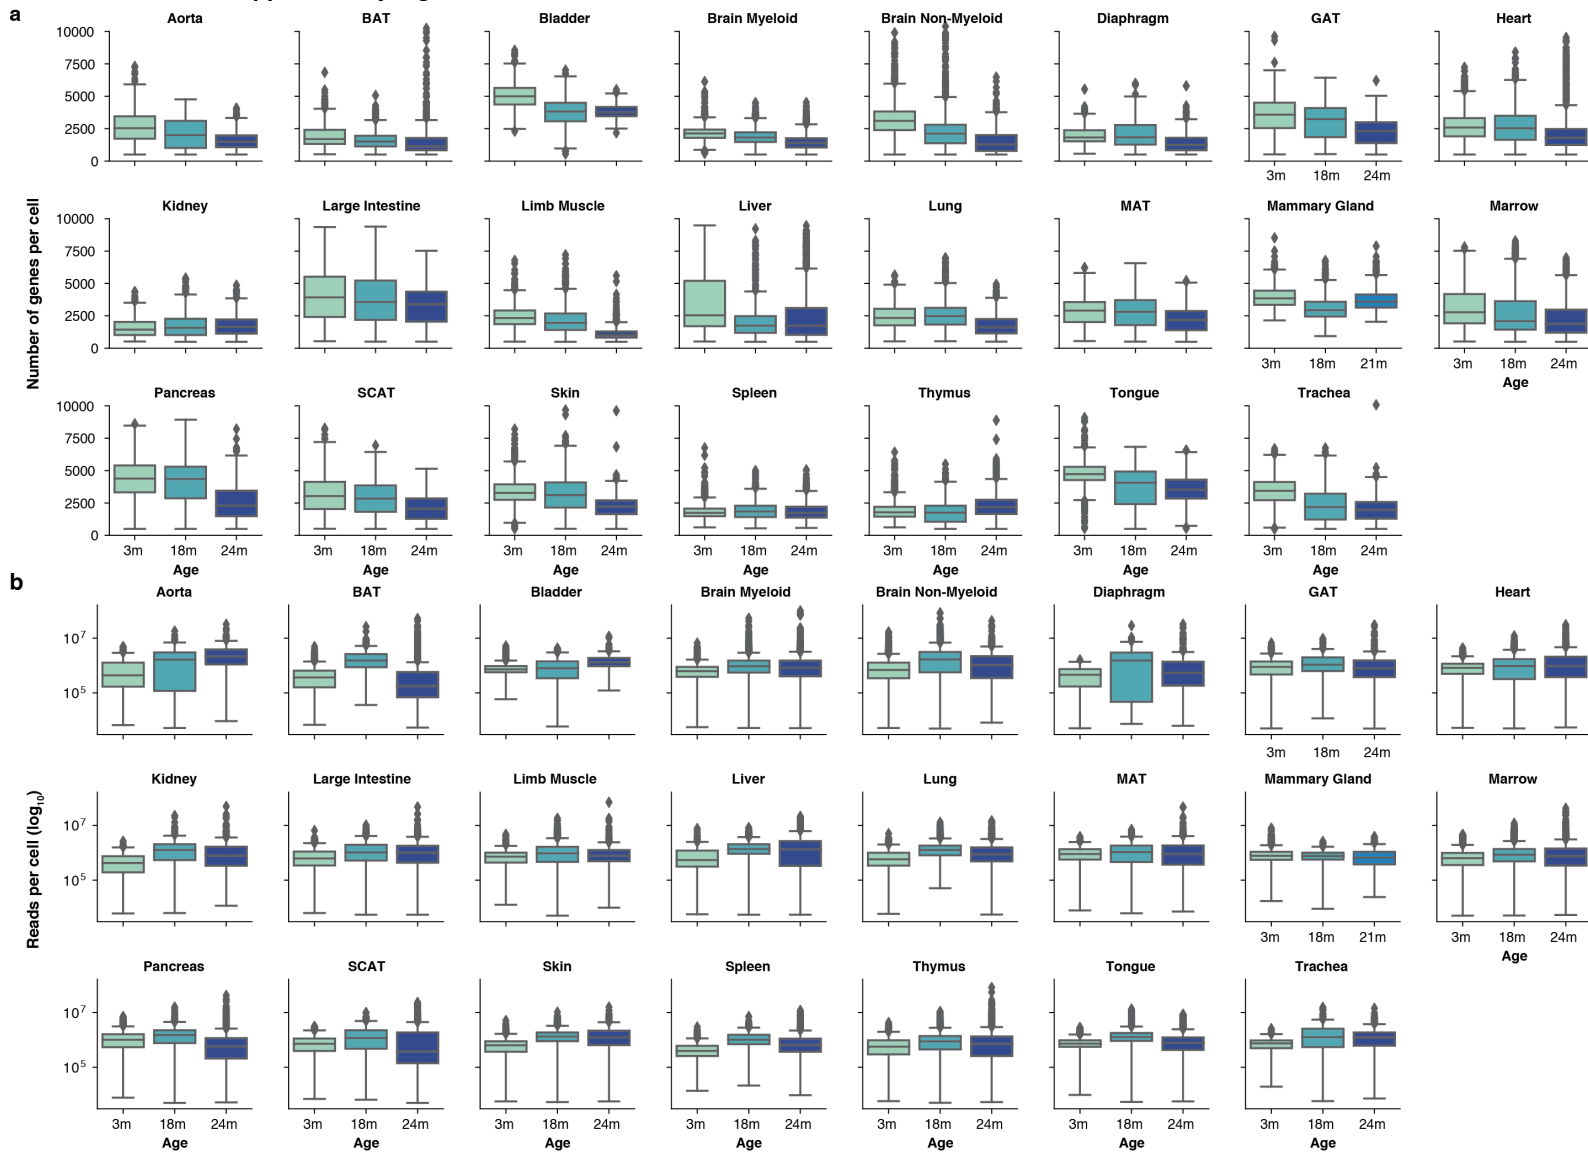

Tabula Muris Senis Supplementary Fig. 2

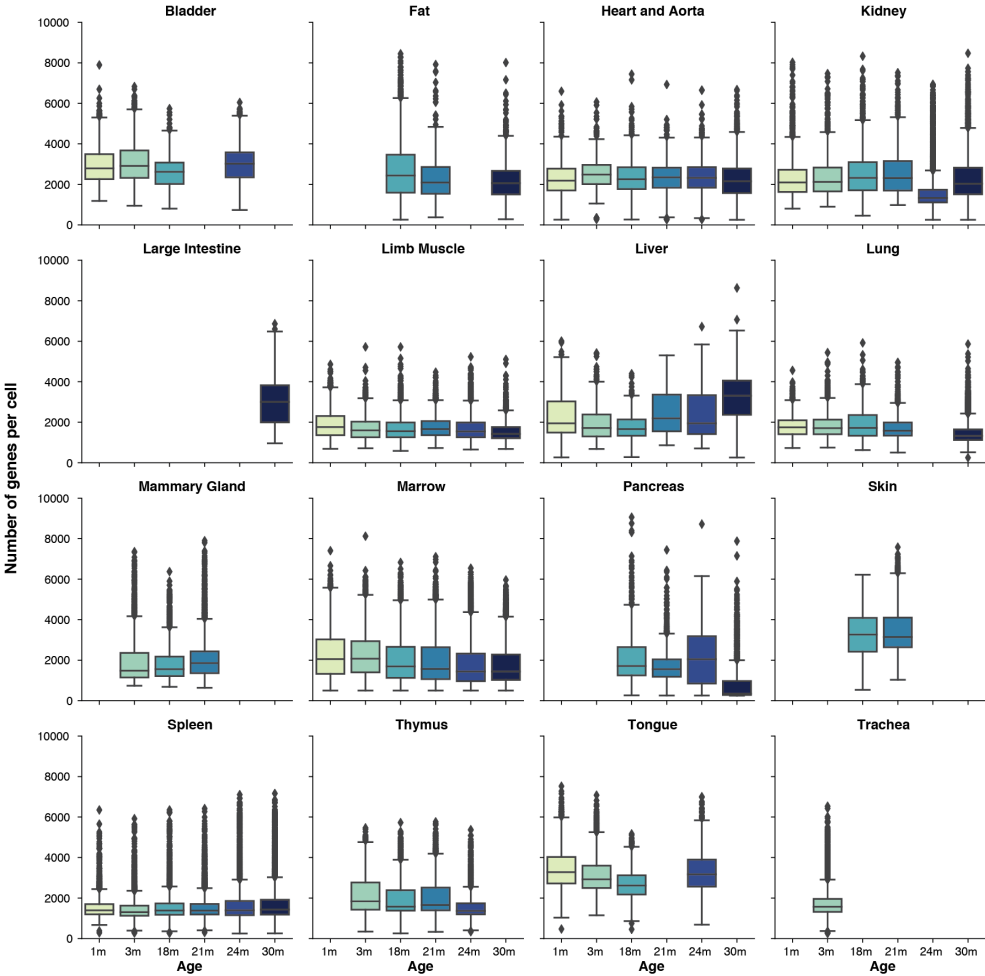

Source: https://www.biorxiv.org/content/10.1101/661728v2.full.pdf
